# Supplementary material for: Chlorhexidine oral rinses for symptomatic COPD: a randomised, blind, placebo-controlled preliminary study
Source: PubMed Central journal article supplement — BMJ Open. 2021 Dec 13;11(12):e050271. doi: 10.1136/bmjopen-2021-050271 (PMC8672026; doi:10.1136/bmjopen-2021-050271), 2021-12-13
Supplement: bmjopen-2021-050271.draft_revisions.pdf [file bmjopen-2021-050271.draft_revisions.pdf]

# BMJ Open

BMJ Open is committed to open peer review. As part of this commitment we make the peer review history of every article we publish publicly available.

When an article is published we post the peer reviewers' comments and the authors' responses online. We also post the versions of the paper that were used during peer review. These are the versions that the peer review comments apply to.

The versions of the paper that follow are the versions that were submitted during the peer review process. They are not the versions of record or the final published versions. They should not be cited or distributed as the published version of this manuscript.

BMJ Open is an open access journal and the full, final, typeset and author-corrected version of record of the manuscript is available on our site with no access controls, subscription charges or pay-per-view fees (<http://bmjopen.bmj.com>).

If you have any questions on BMJ Open's open peer review process please email [info.bmjopen@bmj.com](mailto:info.bmjopen@bmj.com)

# BMJ Open

## Chlorhexidine oral rinses for symptomatic COPD: a randomized, blind, placebo-controlled preliminary study

|                               |                                                                                                                                                                                                                                                                                                                 |
|-------------------------------|-----------------------------------------------------------------------------------------------------------------------------------------------------------------------------------------------------------------------------------------------------------------------------------------------------------------|
| Journal:                      | <i>BMJ Open</i>                                                                                                                                                                                                                                                                                                 |
| Manuscript ID                 | bmjopen-2021-050271                                                                                                                                                                                                                                                                                             |
| Article Type:                 | Original research                                                                                                                                                                                                                                                                                               |
| Date Submitted by the Author: | 16-Feb-2021                                                                                                                                                                                                                                                                                                     |
| Complete List of Authors:     | Pragman, Alexa; Minneapolis VAHCS, Medicine; University of Minnesota Medical School Twin Cities<br>Fieberg, Ann; University of Minnesota Twin Cities<br>Reilly, Cavan; University of Minnesota Twin Cities<br>Wendt, Christine; Minneapolis VAHCS, Medicine; University of Minnesota Medical School Twin Cities |
| Keywords:                     | MICROBIOLOGY, RESPIRATORY MEDICINE (see Thoracic Medicine), Chronic airways disease < THORACIC MEDICINE                                                                                                                                                                                                         |
|                               |                                                                                                                                                                                                                                                                                                                 |

SCHOLARONE™  
Manuscripts

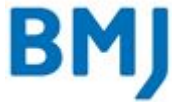

I, the Submitting Author has the right to grant and does grant on behalf of all authors of the Work (as defined in the below author licence), an exclusive licence and/or a non-exclusive licence for contributions from authors who are: i) UK Crown employees; ii) where BMJ has agreed a CC-BY licence shall apply, and/or iii) in accordance with the terms applicable for US Federal Government officers or employees acting as part of their official duties; on a worldwide, perpetual, irrevocable, royalty-free basis to BMJ Publishing Group Ltd ("BMJ") its licensees and where the relevant Journal is co-owned by BMJ to the co-owners of the Journal, to publish the Work in this journal and any other BMJ products and to exploit all rights, as set out in our [licence](#).

The Submitting Author accepts and understands that any supply made under these terms is made by BMJ to the Submitting Author unless you are acting as an employee on behalf of your employer or a postgraduate student of an affiliated institution which is paying any applicable article publishing charge ("APC") for Open Access articles. Where the Submitting Author wishes to make the Work available on an Open Access basis (and intends to pay the relevant APC), the terms of reuse of such Open Access shall be governed by a Creative Commons licence – details of these licences and which [Creative Commons](#) licence will apply to this Work are set out in our licence referred to above.

Other than as permitted in any relevant BMJ Author's Self Archiving Policies, I confirm this Work has not been accepted for publication elsewhere, is not being considered for publication elsewhere and does not duplicate material already published. I confirm all authors consent to publication of this Work and authorise the granting of this licence.

1  
2  
3 Word count (text): 3272

4 Word count (abstract): 275

5  
6  
7 Chlorhexidine oral rinses for symptomatic COPD: a randomized, blind, placebo-controlled  
8 preliminary study  
9

10 Running title: Chlorhexidine oral rinses for symptomatic COPD  
11

12  
13 Alexa A. Pragman, MD, PhD,<sup>1</sup> Ann M. Fieberg, MS,<sup>2</sup> Cavan S. Reilly, PhD,<sup>3</sup> and Chris H. Wendt,  
14 MD<sup>1</sup>

15 <sup>1</sup>Department of Medicine, Minneapolis Veterans Affairs Medical Center and University of  
16 Minnesota, Minneapolis, MN; <sup>2</sup>Coordinating Center for Biometric Research, University of  
17 Minnesota, Minneapolis, MN; <sup>3</sup>Division of Biostatistics, University of Minnesota, Minneapolis,  
18 MN.  
19

20 Corresponding author: Dr. Chris H. Wendt, Department of Medicine, Minneapolis Veterans  
21 Affairs Medical Center and University of Minnesota, Minneapolis, MN 55417;  
22 wendt005@umn.edu;  
23  
24

25 Summary of Conflict of Interest Statements: All authors report no conflicts.  
26

27  
28 Funding information: Flight Attendant Medical Research Institute (FAMRI) Clinical Innovator  
29 Award, (#150014 to CHW); Department of Veterans Affairs Office of Research and Development  
30 (1IK2CX001095 to AAP).  
31

32 Prior presentation: This work was previously presented virtually at IDWeek 2020 (October 21,  
33 2020).  
34  
35  
36  
37  
38  
39  
40  
41  
42  
43  
44  
45  
46  
47  
48  
49  
50  
51  
52  
53  
54  
55  
56  
57  
58  
59  
60

Abbreviations

|        |                                                                |
|--------|----------------------------------------------------------------|
| BCSS   | Breathlessness, Cough, and Sputum Scale                        |
| CLIMB  | chlorhexidine effect in the oral and lung microbiota study     |
| COPD   | chronic obstructive pulmonary disease                          |
| CRP    | c-reactive protein                                             |
| FEV1   | forced expiratory volume in the first second                   |
| FEV1pp | forced expiratory volume in the first second percent predicted |
| MVAMC  | Minneapolis Veterans Affairs Medical Center                    |
| SD     | standard deviation                                             |
| SE     | standard error                                                 |
| SGRQ   | St. George's Respiratory Questionnaire                         |
| WBC    | white blood cell count                                         |

For peer review only

## Abstract

Objectives: Determine the effect of twice-daily chlorhexidine oral rinses on oral and lung microbiota biomass and respiratory symptoms.

Setting: Single center.

Participants: Participants were aged 40-85 with COPD and chronic productive cough or COPD exacerbation within the last year. Exclusions included antibiotics in the previous 2 months and/or those with less than four teeth. Forty-four participants were recruited and 40 completed the study.

Intervention: Participants were randomized 1:1 to twice-daily 0.12% chlorhexidine oral rinses vs. placebo for two months along with daily diaries. SGRQ, blood tests, oral rinse and induced sputum were collected at randomization and the final visit.

Primary and Secondary Outcomes: Primary outcome was a change in oral and sputum microbiota biomass. Secondary outcomes included: sputum and oral microbiota Shannon and Simpson diversity and taxonomy; inflammatory markers; BCSS and SGRQ scores.

Results: Neither the oral microbiota nor the sputum microbiota biomass decreased significantly in those using chlorhexidine compared with placebo (oral microbiota mean  $\log_{10}$  difference [SE] = -0.103 [0.23], 95% CI: -0.59, 0.38,  $p=0.665$ ; sputum microbiota 0.80 [0.46], 95% CI: -0.15, 1.75,  $p=0.096$ ). Chlorhexidine decreased both oral and sputum microbiota alpha (Shannon) diversity (linear regression estimate [SE] oral: -0.349 [0.091],  $p=0.001$ ; sputum -0.622 [0.169],  $p=0.001$ ).

Chlorhexidine use did not decrease systemic inflammatory markers compared to placebo (CRP [chlorhexidine  $1.8 \pm 7.5$  vs. placebo  $0.4 \pm 6.8$ ,  $p=0.467$ ], fibrinogen [ $22.5 \pm 77.8$  vs.  $10.0 \pm 77.0$ ,  $p=0.406$ ], or leukocytes [ $0.2 \pm 1.8$  vs.  $0.5 \pm 1.8$ ,  $p=0.560$ ]). Chlorhexidine use decreased St.

1  
2  
3 George's Respiratory Questionnaire scores compared to placebo (chlorhexidine  $-4.7 \pm 8.0$  vs.  
4  
5 placebo  $1.7 \pm 8.9$ ,  $p=0.032$ ).

6  
7  
8 Conclusions: We did not detect a significant difference in microbiota biomass due to  
9  
10 chlorhexidine use. Chlorhexidine decreased oral and sputum microbiota alpha diversity and  
11  
12 improved respiratory health-related quality of life compared to placebo.  
13  
14

15 Clinical Trial Registration: ClinicalTrials.gov NCT02252588  
16  
17

### 18 19 20 Strengths and Limitations of this Study 21

- 22  
23 • Using a randomized control design, this study will provide the first example of the  
24  
25 effects of altering the oral microbiome in the setting of COPD.  
26  
27
- 28 • A study intervention that is simple, inexpensive, and has few side effects.  
29
- 30 • Our study was limited by its relatively small sample size and single-center design.  
31  
32
- 33 • Other limitations include our inability to distinguish between live and dead bacteria in  
34  
35 our samples.  
36  
37  
38  
39  
40  
41  
42  
43  
44  
45  
46  
47  
48  
49  
50  
51  
52  
53  
54  
55  
56  
57  
58  
59  
60

## Introduction

Chronic obstructive pulmonary disease (COPD) is the 3<sup>rd</sup>-leading cause of death worldwide and a significant cause of morbidity and mortality.<sup>1</sup> COPD symptoms such as chronic cough, sputum production, breathlessness, and wheezing lead to decreased quality of life. COPD exacerbations are a major cause of this morbidity. Medications such as bronchodilators and anti-inflammatory medications modestly reduce COPD exacerbations but have not effectively improved symptoms as assessed by health status. Approximately 50% of COPD exacerbations are attributed to bacteria<sup>2, 3</sup> and patients with COPD often remain colonized with bacteria in their lower respiratory tracts even during periods of stable disease.<sup>3</sup> These bacteria make up the lung microbiota. Recent evidence supports that the oral microbiota is the main source of the lung microbiota.<sup>4, 5</sup> The COPD lung microbiota also correlates with COPD exacerbation frequency.<sup>6</sup> No studies have yet been conducted that seek to alter the COPD microbiota biomass using common and safe medications with only mild side effects.

Chlorhexidine is a topical antiseptic that is FDA-approved for use as an oral rinse.<sup>7</sup> It binds to bacterial cell walls and exerts bacteriostatic and bacteriocidal effects; it is broadly active against Gram positive and Gram negative bacteria as well as yeasts. In oral rinses it reduces dental plaque, gingivitis, periodontitis, and decreases oral bacteria after dental extractions or trauma. In meta-analysis, chlorhexidine oral rinses have been shown to reduce the risk of ventilator-associated pneumonia.<sup>8</sup> It is well-tolerated, with known side effects consisting of mild oral discomfort, transient decrease in taste, and tooth discoloration (particularly with tea or coffee consumption).



1  
2  
3  
4  
5  
6 Randomized controlled trials of chlorhexidine oral rinses for dental diseases have shown some  
7  
8 possible decrease in oral bacterial biomass,<sup>9, 10</sup> decrease in specific oral pathogens,<sup>10</sup> and  
9  
10 decreased alpha diversity of the oral microbiota.<sup>11</sup> Oral chlorhexidine use results in an  
11  
12 immediate and sustained decrease in oral bacteria viability.<sup>12</sup>  
13  
14  
15

16  
17  
18 There is compelling evidence that chlorhexidine oral rinses improve oral health and are safe  
19  
20 and well-tolerated. The oral microbiota is the source of the lung microbiota likely due to  
21  
22 microaspiration. Among those with COPD, the oral and sputum microbiota correlate with COPD  
23  
24 exacerbation frequency.<sup>6</sup> Oral treatment with chlorhexidine alters the oral microbiota, which  
25  
26 may subsequently alter the lung microbiota and COPD-related symptoms. Our primary aim was  
27  
28 to determine the effect of twice-daily chlorhexidine oral rinses on oral and lung microbiota  
29  
30 biomass in participants with COPD.  
31  
32  
33  
34  
35  
36  
37  
38  
39

## 40 **Methods**

41  
42 The chlorhexidine effect in the oral and lung microbiota study (CLIMB) is a randomized, blind,  
43  
44 placebo-controlled, parallel-group preliminary study of the effects of chlorhexidine oral rinses  
45  
46 on COPD. It was conducted at a single tertiary-care Veterans Affairs medical center (USA).  
47  
48 Ethics approval was granted by the Minneapolis Veterans Affairs Medical Center (MVAMC)  
49  
50 Institutional Review Board (#4526-A; ClinicalTrials.gov NCT02252588), all participants provided  
51  
52 written consent, and all procedures adhered to the study protocol. A data monitoring  
53  
54  
55  
56  
57  
58  
59  
60

1  
2  
3 committee did not oversee the study. Protocol and additional methods are provided in an  
4  
5  
6 online data supplement.  
7  
8  
9

#### 10 Patient and public involvement

11  
12 The design of this study was based on previous randomized clinical trials designed for COPD  
13  
14  
15 exacerbations. We further received input from expert clinicians and researchers within the  
16  
17  
18 COPD Clinical Research Network. Patients with COPD were not involved in the development of  
19  
20 the protocol, but participant feedback was obtained during the study.  
21  
22

#### 23 24 25 26 Study Protocol:

27  
28 Eligible participants were invited to participate in the study and consisted of those age 40-85  
29  
30  
31 years with a diagnosis of COPD and the presence or high likelihood of a chronic cough and  
32  
33  
34 sputum production. Participants were excluded if they were not fully recovered for at least 30  
35  
36 days from a COPD exacerbation or were treated with antibiotics in the last two months.  
37

38  
39  
40 Participants were assigned (1:1) via a random number generator to receive either 15 mL of  
41  
42  
43 twice-daily 0.12% oral chlorhexidine rinses (PerioGard®)<sup>7</sup> or matched placebo mouth rinses for  
44  
45  
46 eight weeks. The pharmacist conducted the allocation and assignment and was the only staff  
47  
48 member unblinded to study assignment.  
49

50  
51  
52 At visit 1, participants provided medical history, performed spirometry, completed the St.  
53  
54  
55 George's Respiratory Questionnaire (SGRQ),<sup>13, 14</sup> were instructed on how to complete the  
56  
57  
58

1  
2  
3 Breathlessness, Cough, and Sputum Scale (BCSS)<sup>15</sup> daily diaries, and provided blood, oral, and  
4 induced sputum samples prior to randomization. Oral and sputum sample volumes were  
5 recorded. Participants returned 8 weeks later to return BCSS diaries, complete the SGRQ, assess  
6 outcomes, and provide blood, oral, and sputum samples.  
7  
8  
9  
10  
11  
12  
13  
14

15 The clinical laboratories at the MVAMC determined WBC and differential, fibrinogen, CRP  
16 levels, and sputum gram stain and culture results. All oral rinses, sputum samples, and unused  
17 sterile water (control samples) were frozen immediately and until DNA extraction. 16S rRNA  
18 quantification and 16S rRNA V4 MiSeq sequencing was performed at the University of  
19 Minnesota Genomics Center as previously described.<sup>16</sup>  
20  
21  
22  
23  
24  
25  
26  
27  
28  
29

### 30 Outcomes and Power Analysis:

31  
32 The primary outcome was change in oral and sputum microbiota biomass after 8 weeks of  
33 chlorhexidine vs. placebo use, compared to baseline values as assessed by 16S rRNA  
34 quantification. The primary outcome was chosen based on the mechanism of action of  
35 chlorhexidine, however sample size calculations were based on a change in alpha diversity (a  
36 secondary outcome) due to data availability at study initiation. At a sample size of 20 per group  
37 and across a plausible range of effect sizes, our study had 67-94% power to detect a change in  
38 alpha diversity associated with chlorhexidine use. Sample size calculations are available in the  
39 online supplement. Secondary outcomes included: sputum and oral microbiota Shannon and  
40 Simpson diversity; sputum and oral microbiota taxonomy; inflammatory markers (WBC,  
41 fibrinogen, and CRP); BCSS scores; SGRQ score; and assessment of adverse events.  
42  
43  
44  
45  
46  
47  
48  
49  
50  
51  
52  
53  
54  
55  
56  
57  
58  
59  
60

1  
2  
3  
4  
5  
6 Statistical Analysis:  
7

8 Baseline variables were compared using Fisher's Exact Test for categorical variables or the  
9  
10 Wilcoxon Two-Sample Test for continuous variables. Means are presented with standard  
11  
12 deviations (SD); mean differences and parameter estimates are presented with their associated  
13  
14 standard error (SE).  
15  
16  
17  
18  
19

20 All analyses were performed using SAS version 9.4 (SAS Institute) and the intention-to-treat  
21  
22 principle. A two-sided type I error of 0.05 was used. Correction of the Type I error rate for  
23  
24 multiple testing was performed using the Step-down Bonferroni method.<sup>17</sup>  
25  
26  
27  
28  
29

30 For the primary analysis of both normalized oral wash and normalized sputum biomass count,  
31  
32 values were transformed to the  $\log_{10}$  scale and the mean difference between treatment groups  
33  
34 was compared using the two-sample t-test. A multiple imputation procedure was used to  
35  
36 impute each unavailable sputum weight.  
37  
38  
39  
40  
41

42 Linear regression was used to examine the effect of treatment group on the 8-week change in  
43  
44 the Shannon and Simpson biodiversity indices, BCSS, SGRQ and inflammatory markers  
45  
46 separately, with each model adjusted for the baseline value of the measure.  
47  
48  
49  
50  
51

52 Subgroup analyses of participants who did not receive antibiotics during the study were also  
53  
54 performed for the outcomes of biomass and biodiversity.  
55  
56  
57  
58  
59

1  
2  
3  
4  
5  
6 For taxa abundance analyses, treatment effects on abundance were examined by modeling the  
7  
8 8-week change using linear regression, adjusted for baseline count. Analysis was restricted to  
9  
10 genera with <20% of values equal to zero. Fisher's Exact Test was used to determine the  
11  
12 proportion with a genus detected at Week 8 vs. baseline compared between treatment  
13  
14 groups. Results were corrected for multiple comparisons.  
15  
16  
17  
18  
19  
20  
21  
22

## 23 **Results**

24  
25 CLIMB assessed 511 participants for eligibility, excluded 215 because they did not meet criteria,  
26  
27 252 declined to participate, and 44 were randomized to study medication. Participants were  
28  
29 recruited between September 8, 2014 and May 30, 2019 and the study ended when 40  
30  
31 participants completed the 8-week study. Four participants (all randomized to chlorhexidine)  
32  
33 discontinued the study, leaving 20 participants in each group who completed the study. One  
34  
35 participant withdrew without using any study medication, while the other 3 were lost to follow  
36  
37 up (Figure 1). The primary data analysis included all those who completed the study, with  
38  
39 baseline and mid-study phone call data included for non-completers when available. A sub-  
40  
41 analysis of the microbiota data was conducted after excluding samples obtained from  
42  
43 participants who used antibiotics during the study period.  
44  
45  
46  
47  
48  
49  
50  
51

52 Of the 44 CLIMB participants, 41 (93%) were male and 42 (95%) were Caucasian. The mean age  
53  
54 was 67.9 years and mean tobacco exposure was 58.2 pack-years. Most were former tobacco  
55  
56  
57  
58  
59

1  
2  
3 users (31, 70%) and the remainder were current smokers. High blood pressure (31, 70%) and  
4  
5 coronary artery disease (27, 61%) were reported by most participants. Mean FEV<sub>1</sub> % predicted  
6  
7 (FEV<sub>1pp</sub>) was 41.7% and the mean number of COPD exacerbations reported in the prior 12  
8  
9 months was 2.1. Baseline mean SGRQ score was 45.8. No baseline characteristics differed  
10  
11 significantly by treatment group (Table 1).  
12  
13  
14  
15

16  
17  
18 The number of participants experiencing a COPD exacerbation or using an antibiotic or oral  
19  
20 corticosteroid during the study period are presented in Table 2. Eight participants (3 in the  
21  
22 chlorhexidine group, 5 in the placebo group) received antibiotics during the study; most but not  
23  
24 all antibiotic use was for a respiratory indication. No participants experienced more than one  
25  
26 exacerbation, more than one course of antibiotics, or more than one course of oral  
27  
28 corticosteroids during the study.  
29  
30  
31  
32  
33

34  
35 Our primary outcome was a change in oral and sputum microbiota biomass during the study  
36  
37 period as assessed by 16S rRNA copy numbers. Sputum production was heterogeneous across  
38  
39 participants and samples, so sputum sample 16S copy numbers were normalized to (i.e.,  
40  
41 divided by) sputum sample mass. Oral sample size also varied due to variations in expectoration  
42  
43 efficiency and were therefore also normalized to oral sample mass. Oral rinse samples were  
44  
45 available for 40 participants (20 per group). There was a decrease in biomass in both groups;  
46  
47 the mean  $\pm$  SD changes were  $-0.24 \pm 1.0$  and  $-0.14 \pm 0.32$  in the chlorhexidine and placebo  
48  
49 groups respectively (Table 3a). The mean difference between treatment groups (active-  
50  
51 placebo) was not significant (mean diff [SE] =  $-0.103 [0.23]$ , 95% Confidence Interval [CI]:  $[-0.59,$   
52  
53  
54  
55  
56  
57  
58  
59  
60

1  
2  
3 0.38],  $p=0.665$ ). Very similar results were seen in the subgroup that did not use antibiotics  
4  
5 during the study ( $N=32$ , mean diff [SE] =  $-0.07$  [0.29], 95% CI:  $[-0.65, 0.51]$ ,  $p=0.808$ ) (Table 3b).  
6  
7  
8

9  
10 For the analysis of biomass in sputum samples, 5 chlorhexidine and 4 placebo participants were  
11  
12 unable to provide sputum samples; 2 were unable at Baseline, 6 were unable at Week 8  
13  
14 (including the 4 withdrawals), and one was unable at both Baseline and Week 8. Sputum  
15  
16 weight is required for biomass count normalization and among the remaining 35 samples, there  
17  
18 were 11 missing sputum weight values (6 at Baseline, 5 at Week 8) among 4 placebo and 4  
19  
20 chlorhexidine participants. Table 3b shows the primary analysis results using a two-sample t-  
21  
22 test with the normalized data available ( $N=27$ ) and using a multiple imputation procedure to  
23  
24 estimate the missing sputum weights ( $N=35$ ). The two analysis methods provide similar results.  
25  
26 Although we hypothesized that the estimate would be negative, indicating that the active group  
27  
28 saw a larger decrease in biomass from Baseline to Week 8 than the placebo group, without  
29  
30 imputation we see a non-significant effect in the opposite direction (mean  $\log_{10}$  difference[SE]  
31  
32 =  $0.80$  [0.46], 95% CI =  $[-0.15, 1.75]$ ,  $p=0.096$ ) and similarly with imputation (mean  $\log_{10}$   
33  
34 difference[SE] =  $0.70$  [0.39], 95% CI =  $[-0.08, 1.47]$ ,  $p=0.078$ ). These results were supported by  
35  
36 the subgroup analyses of those without antibiotic use during the study. Although the p-value  
37  
38 for the imputation analysis is significant ( $p=0.036$ ) and the effect is not in the hypothesized  
39  
40 direction, this result should be interpreted with caution due to the large number of tests  
41  
42 reviewed here.  
43  
44  
45  
46  
47  
48  
49  
50  
51  
52  
53  
54  
55  
56  
57  
58  
59  
60

1  
2  
3 Linear regression was used to examine the 8-week change in each biodiversity index (Shannon  
4 and Simpson Indices) as a function of treatment group and adjusted for the value of the index  
5 at baseline (Table 4). As hypothesized, those in the chlorhexidine group saw, on average, a  
6 significant decrease in the diversity indices in comparison to those in the placebo group. For  
7 the oral wash samples, those in the treatment group had a coefficient of -0.349 (SE=0.091, adj.  
8 p=0.001) for the Shannon diversity index and -0.030 (SE=0.008, adj. p=0.001) for the Simpson  
9 diversity index. The results were similar for sputum samples: -0.622 (SE=0.169, adj. p=0.001)  
10 for the Shannon diversity index and -0.091 (SE=0.034, adj. p=0.0123) for the Simpson diversity  
11 index.  
12  
13  
14  
15  
16  
17  
18  
19  
20  
21  
22  
23  
24  
25  
26  
27

28 For the additional secondary outcomes, the effect of treatment group on the 8-week change  
29 was examined using linear regression, adjusted for the measure at baseline (Table 5). There  
30 was no significant difference between treatment groups over the 8-week study period in BCSS  
31 score (mean change in the chlorhexidine and placebo groups respectively  $\pm$  SD:  $-0.3 \pm 1.9$  vs.  $-$   
32  $0.1 \pm 1.5$ , estimate [95% CI] =  $-0.28 [-1.45, 0.89]$ ,  $p=0.630$ ), CRP ( $1.8 \pm 7.5$  vs.  $0.4 \pm 6.8$ ,  $1.54 [-$   
33  $2.72, 5.80]$ ,  $p=0.467$ ), fibrinogen ( $22.5 \pm 77.8$  vs.  $10.0 \pm 77.0$ ,  $20.19 [-28.52, 68.91]$ ,  $p=0.406$ ), or  
34 leukocytes ( $0.2 \pm 1.8$  vs.  $0.5 \pm 1.8$ ,  $-0.32 [-1.42, 0.78]$ ,  $p=0.560$ ). Participants in the  
35 chlorhexidine group showed a significantly larger decrease in SGRQ total score when compared  
36 with the placebo group (mean change  $\pm$  SD:  $-4.7 \pm 8.0$  vs.  $1.7 \pm 8.9$ ,  $-6.22 [-11.87, -0.57]$ ,  
37  $p=0.032$ ). This difference was not evidenced in any one SGRQ domain.  
38  
39  
40  
41  
42  
43  
44  
45  
46  
47  
48  
49  
50  
51  
52  
53  
54  
55  
56  
57  
58  
59  
60



1  
2  
3 In exploratory analyses, we evaluated the taxonomic composition of samples to assess for  
4 chlorhexidine-associated changes in the microbiota. Among sputum samples there were 42  
5  
6 genera. The results of the linear regression analyses showed that only *Corynebacterium*  
7  
8 sequences were less abundant after chlorhexidine use compared with placebo (mean change in  
9  
10 the chlorhexidine and placebo groups respectively  $\pm$  SD:  $-197 \pm 342$  vs.  $12 \pm 337$ , estimate [95%  
11  
12 CI] =  $-282 [-438, -126]$ , adjusted  $p=0.0378$ ). Among oral wash samples there were 43 genera.  
13  
14 Only *Lachnoanaerobaculum* sequences were less abundant after chlorhexidine use compared  
15  
16 to placebo (mean change in the chlorhexidine and placebo groups respectively  $\pm$  SD:  $-313 \pm 483$   
17  
18 vs.  $216 \pm 509$ , estimate [95% CI] =  $-521 [-815, -226]$ , adjusted  $p=0.043$ ). Follow up analyses  
19  
20 relying on the presence or absence of sequences (rather than relative abundance) produced  
21  
22 similar results.  
23  
24  
25  
26  
27  
28  
29  
30  
31  
32

33 Very few adverse events were experienced over the course of the study (Table 6).  
34  
35  
36  
37  
38  
39

## 40 Discussion

41  
42 In this preliminary study, twice-daily chlorhexidine oral rinses decreased oral and sputum  
43  
44 microbiota alpha diversity and improved pulmonary disease-related quality of life compared to  
45  
46 placebo among those with symptomatic COPD. Chlorhexidine oral rinses did not appear to  
47  
48 decrease the oral or sputum microbiota biomass, our primary outcome, compared to placebo  
49  
50 as assessed by normalized 16S rRNA quantitative PCR. Furthermore, during the 8-week  
51  
52  
53  
54  
55  
56  
57  
58  
59  
60

1  
2  
3 treatment period chlorhexidine did not appear to decrease systemic inflammation or COPD  
4 symptoms, as assessed by the BCSS, compared to placebo.  
5  
6  
7  
8  
9

10 We chose a change in biomass as our primary endpoint as we hypothesized that twice daily  
11 chlorhexidine would have its largest effect on microbiota biomass. However, we did not detect  
12 a significant decrease in biomass as a result of chlorhexidine use utilizing quantitative PCR.  
13 Chlorhexidine is known to be bactericidal and previous work has identified a decrease in viable  
14 bacteria following chlorhexidine oral use compared to water. Our total DNA extraction  
15 technique coupled with PCR-based biomass determination is unable to distinguish between live  
16 and dead bacteria. It is therefore possible that chlorhexidine decreased the number of live  
17 bacteria in the oral and sputum microbiota, and that our PCR-based biomass determination  
18 technique was unable to distinguish between live bacterial biomass and dead bacteria.  
19 Furthermore, both groups experienced some decrease in biomass during the study period.  
20 Changes in dental care habits, including twice-daily oral rinsing with either study drug or  
21 placebo, may be responsible for this decrease.  
22  
23  
24  
25  
26  
27  
28  
29  
30  
31  
32  
33  
34  
35  
36  
37  
38  
39  
40  
41

42 Although total microbiota biomass did not appear to change, oral and sputum microbiota alpha  
43 diversity decreased as a result of chlorhexidine use. The healthy lung and oral microbiota  
44 generally demonstrate greater alpha diversity than the microbiota found in disease states such  
45 as COPD or cystic fibrosis. Whether this association is due to frequent use of antibiotics among  
46 those with chronic lung disease or due to the chronic lung disease itself remains unknown. Loss  
47 of alpha diversity due to chlorhexidine use may seem paradoxical given our current  
48  
49  
50  
51  
52  
53  
54  
55  
56  
57  
58  
59  
60

1  
2  
3 understanding of the relationship between low alpha diversity and worsening lung symptoms,  
4  
5 however the current disease model does not differentiate between alpha diversity *per se* and  
6  
7 the mechanisms by which it may be manipulated. Loss of alpha diversity due to chlorhexidine  
8  
9 use, antibiotic use, or chronic lung inflammation likely represent clinically distinct entities.  
10  
11

12  
13  
14  
15 Use of chlorhexidine oral rinses vs. placebo did not result in decreased systemic inflammation  
16  
17 as evidenced by CRP, fibrinogen and WBC values. These three systemic markers of  
18  
19 inflammation are often elevated among those with symptomatic COPD. In light of our other  
20  
21 findings linking chlorhexidine use to microbiota alterations and improved respiratory-related  
22  
23 quality of life, we had expected that chlorhexidine use would lead to decreased systemic  
24  
25 inflammation. It is possible that chlorhexidine use improved local inflammation (in the lungs or  
26  
27 mouth) without resulting in systemic inflammatory changes. Sustained use over a longer time  
28  
29 period may be needed in order to observe systemic anti-inflammatory effects.  
30  
31  
32  
33  
34  
35  
36  
37

38 Although chlorhexidine use did not result in significant changes to BCSS scores, respiratory  
39  
40 health-related quality of life did improve with use of chlorhexidine oral rinses vs. placebo during  
41  
42 the 8-week intervention. SGRQ scores improved significantly among the chlorhexidine group  
43  
44 relative to the placebo group, with a mean improvement (4.7 points) that is clinically  
45  
46 meaningful (minimum clinically important difference of 4 points). The SGRQ encompasses 3  
47  
48 sub-scores for activity, impacts, and symptoms. No sub-score reached statistical significance,  
49  
50 indicating that chlorhexidine use improved quality of life broadly, and was not due to isolated  
51  
52 improvements in one or two SGRQ sub-domains. Our data support the further study of  
53  
54  
55  
56  
57  
58  
59  
60

1  
2  
3 chlorhexidine oral rinses among symptomatic patients with COPD to improve respiratory  
4  
5 health-related quality of life.  
6  
7  
8  
9

10 In an exploratory analysis of the effects of chlorhexidine use on the sputum and oral  
11  
12 microbiota, the only genus-level changes in DNA abundance were a decrease in  
13  
14 *Corynebacterium* in sputum and a decrease in *Lachnoanaerobaculum* in oral rinses.  
15  
16

17 Chlorhexidine is known to broadly decrease the viability of bacteria and yeast. Our microbiota  
18  
19 analysis techniques, which cannot differentiate between DNA from “live” or “dead” organisms,  
20  
21 therefore may be relatively insensitive to the effects of chlorhexidine. We were unable to  
22  
23 detect overall changes in bacterial biomass or broad changes to individual genera among those  
24  
25 using chlorhexidine compared with placebo. It is possible that broader assessments of the  
26  
27 community composition, such as alpha diversity, are better able to detect chlorhexidine-related  
28  
29 changes.  
30  
31  
32  
33  
34  
35  
36

37 Our preliminary study had several strengths and limitations. Its strengths include a study  
38  
39 intervention that is simple, inexpensive, and has few side effects; the randomized and blinded  
40  
41 nature of the study; and objective assessment of outcomes. Our study was limited by its  
42  
43 relatively small sample size and single-center design. In addition, other limitations include our  
44  
45 inability to distinguish between live and dead bacteria in our samples, incomplete sample  
46  
47 weights, lack of assessment of local inflammation, and limited in-person follow up while on  
48  
49 study drug. Future larger clinical trials will determine if the beneficial effects of chlorhexidine  
50  
51  
52  
53  
54  
55  
56  
57  
58  
59  
60

1  
2  
3 oral rinses can be sustained among COPD subjects, and the biological mechanisms for these  
4  
5 improvements in quality of life.  
6  
7  
8  
9

10 Although we did not find a difference in daily respiratory symptoms as measured with the BCSS,  
11  
12 we found a significant improvement in quality of life as measured by the SGRQ. This potential  
13  
14 discrepancy likely arose because BCSS focuses solely on respiratory symptoms, while the SGRQ  
15  
16 also assesses the broader impacts of COPD symptoms on quality of life. There was no single  
17  
18 domain within the SGRQ that drove this result, but there was improvement in both the impacts  
19  
20 and symptoms domains. We propose that oral chlorhexidine rinses improve respiratory health-  
21  
22 related quality of life by decreasing the number of live oral bacteria, altering the content of the  
23  
24 live oral microbiota, or both. Changes to the oral microbiota may decrease the lung  
25  
26 inflammation that occurs following aspiration or change the composition of the lung microbiota  
27  
28 itself and lead to an improved sense of wellness.  
29  
30  
31  
32  
33  
34  
35  
36  
37  
38  
39  
40  
41  
42  
43  
44  
45  
46  
47  
48  
49

50 An additional clinical trial is needed to confirm our clinical endpoint findings with a larger group  
51  
52 of participants and evaluate the mechanistic links between chlorhexidine, viable bacterial  
53  
54 biomass, the microbiota, and respiratory health-related quality of life in symptomatic patients  
55  
56 with COPD.  
57  
58  
59

60 Our data indicate that the use of twice-daily chlorhexidine oral rinses among symptomatic  
patients with COPD improves quality of life. This was a secondary outcome in our study and

1  
2  
3 warrants validation in a larger clinical trial. Our intervention is relatively easy to implement,  
4  
5  
6 inexpensive, and well-tolerated.  
7  
8  
9  
10  
11  
12  
13  
14  
15  
16  
17  
18  
19  
20  
21  
22  
23  
24  
25  
26  
27  
28  
29  
30  
31  
32  
33  
34  
35  
36  
37  
38  
39  
40  
41  
42  
43  
44  
45  
46  
47  
48  
49  
50  
51  
52  
53  
54  
55  
56  
57  
58  
59  
60

For peer review only

## Acknowledgements

We gratefully acknowledge Ms. Susan Johnson (study coordinator), Mr. Shane Hodgson and Ms. Allison Zank (laboratory technicians), Dr. Douglas DeCarolis (research pharmacist), and Mr. Trevor J. Gould (bioinformatician). The views expressed in this article are those of the authors and do not reflect the views of the United States Government, the Department of Veterans Affairs, the funders, the sponsors, or any of the authors' affiliated academic institutions.

Study data were collected and managed using REDCap electronic data capture tools hosted at the University of Minnesota.<sup>18, 19</sup> REDCap (Research Electronic Data Capture) is a secure, web-based software platform designed to support data capture for research studies, providing 1) an intuitive interface for validated data capture; 2) audit trails for tracking data manipulation and export procedures; 3) automated export procedures for seamless data downloads to common statistical packages; and 4) procedures for data integration and interoperability with external sources.

Guarantor statement: Dr. Wendt is the guarantor of the content of the manuscript, including the data and analysis.

Author Contributions: AAP supervised research laboratory work, critically reviewed the data analyses, and wrote the first draft with input from AMF. AMF performed the statistical analyses with supervision from CSR, contributed to the first draft, and created the figure and tables. CSR supervised the statistical analyses and critically reviewed the manuscript. CHW obtained

1  
2  
3 funding, supervised subject recruitment, critically reviewed the data analysis, and critically  
4  
5 reviewed the manuscript.  
6

7  
8 Financial/nonfinancial disclosures: All authors report no conflicts of interests.  
9

10 Role of the sponsors: The sponsors had no role in the design, conduct, analysis, or  
11  
12 interpretation of the data.  
13  
14  
15  
16  
17  
18  
19  
20  
21  
22  
23  
24  
25  
26  
27  
28  
29  
30  
31  
32  
33  
34  
35  
36  
37  
38  
39  
40  
41  
42  
43  
44  
45  
46  
47  
48  
49  
50  
51  
52  
53  
54  
55  
56  
57  
58  
59  
60

For peer review only



## References

1. <https://www.who.int/news-room/fact-sheets/detail/the-top-10-causes-of-death>.  
<https://www.who.int/news-room/fact-sheets/detail/the-top-10-causes-of-death>.  
Accessed July 12, 2020.
2. Sethi S, Maloney J, Grove L, Wrona C, Berenson CS. Airway inflammation and bronchial bacterial colonization in chronic obstructive pulmonary disease. *Am J Respir Crit Care Med*. 2006;173(9):991-998.
3. Sethi S, Murphy TF. Bacterial infection in chronic obstructive pulmonary disease in 2000: a state-of-the-art review. *Clinical Microbiology Reviews*. 2001;14(2):336-+.
4. Pragman AA, Lyu T, Baller JA *et al*. The lung tissue microbiota of mild and moderate chronic obstructive pulmonary disease. *Microbiome*. 2018;6(1):e47305.
5. Bassis CM, Erb-Downward JR, Dickson RP *et al*. Analysis of the upper respiratory tract microbiotas as the source of the lung and gastric microbiotas in healthy individuals. *MBio*. 2015;6(2):e00037.
6. Pragman AA, Knutson KA, Gould TJ, Isaacson RE, Reilly CS, Wendt CH. Chronic obstructive pulmonary disease upper airway microbiota alpha diversity is associated with exacerbation phenotype: a case-control observational study. *Respir Res*. 2019;20(1):114.
7. [https://www.google.com/url?sa=t&rct=j&q=&esrc=s&source=web&cd=&ved=2ahUKEwj5uKeM3IzsAhXYWc0KHS4nCHYQFjAAegQIBBAB&url=https%3A%2F%2Fwww.accessdata.fda.gov%2Fdrugsatfda\\_docs%2Fnda%2Fpre96%2F73695\\_PerioGard\\_Prntlbl.pdf&usg=AOvVaw16U5biulfx1TcGpyoeX\\_wg](https://www.google.com/url?sa=t&rct=j&q=&esrc=s&source=web&cd=&ved=2ahUKEwj5uKeM3IzsAhXYWc0KHS4nCHYQFjAAegQIBBAB&url=https%3A%2F%2Fwww.accessdata.fda.gov%2Fdrugsatfda_docs%2Fnda%2Fpre96%2F73695_PerioGard_Prntlbl.pdf&usg=AOvVaw16U5biulfx1TcGpyoeX_wg).

- 1  
2  
3 [https://www.accessdata.fda.gov/drugsatfda\\_docs/nda/pre96/73695\\_PerioGard\\_Prntlbl.p](https://www.accessdata.fda.gov/drugsatfda_docs/nda/pre96/73695_PerioGard_Prntlbl.pdf)  
4  
5  
6 df. Accessed July 12, 2020.  
7
- 8 8. Hua F, Xie H, Worthington HV, Furness S, Zhang Q, Li C. Oral hygiene care for critically ill  
9 patients to prevent ventilator-associated pneumonia. *Cochrane Database Syst Rev*.  
10 2016;10:CD008367.  
11
  - 12 9. Becerik S, Türkoğlu O, Emingil G, Vural C, Ozdemir G, Atilla G. Antimicrobial effect of  
13 adjunctive use of chlorhexidine mouthrinse in untreated gingivitis: a randomized, placebo-  
14 controlled study. *APMIS*. 2011;119(6):364-372.  
15
  - 16 10. Persson GR, Yeates J, Persson RE, Hirschi-Imfeld R, Weibel M, Kiyak HA. The impact of a  
17 low-frequency chlorhexidine rinsing schedule on the subgingival microbiota (the TEETH  
18 clinical trial). *J Periodontol*. 2007;78(9):1751-1758.  
19
  - 20 11. Al-Kamel A, Baraniya D, Al-Hajj WA *et al*. Subgingival microbiome of experimental  
21 gingivitis: shifts associated with the use of chlorhexidine and N-acetyl cysteine  
22 mouthwashes. *J Oral Microbiol*. 2019;11(1):1608141.  
23
  - 24 12. Quintas V, Prada-López I, Donos N, Suárez-Quintanilla D, Tomás I. In situ neutralisation of  
25 the antibacterial effect of 0.2% Chlorhexidine on salivary microbiota: Quantification of  
26 substantivity. *Arch Oral Biol*. 2015;60(8):1109-1116.  
27
  - 28 13. Jones PW, Quirk FH, Baveystock CM. The St George's Respiratory Questionnaire. *Respir*  
29 *Med*. 1991;85 Suppl B:25-31; discussion 33.  
30
  - 31 14. Jones PW. St. George's Respiratory Questionnaire: MCID. *COPD*. 2005;2(1):75-79.  
32  
33  
34  
35  
36  
37  
38  
39  
40  
41  
42  
43  
44  
45  
46  
47  
48  
49  
50  
51  
52  
53  
54  
55  
56  
57  
58  
59  
60

- 1  
2  
3 15. Leidy NK, Rennard SI, Schmier J, Jones MK, Goldman M. The breathlessness, cough, and  
4  
5 sputum scale: the development of empirically based guidelines for interpretation. *Chest*.  
6  
7 2003;124(6):2182-2191.  
8  
9
- 10 16. Pragman AA, Knutson KA, Gould TJ *et al*. Chronic obstructive pulmonary disease upper  
11  
12 airway microbiome is associated with select clinical characteristics. *PLOS ONE*.  
13  
14 2019;14(7):e0219962.  
15  
16
- 17 17. Holm S. A simple sequentially rejective multiple test procedure. *Scand J Stat*. 1979;6:65-  
18  
19 70.  
20  
21
- 22 18. Harris PA, Taylor R, Thielke R, Payne J, Gonzalez N, Conde JG. Research electronic data  
23  
24 capture (REDCap)--a metadata-driven methodology and workflow process for providing  
25  
26 translational research informatics support. *J Biomed Inform*. 2009;42(2):377-381.  
27  
28
- 29 19. Harris PA, Taylor R, Minor BL *et al*. The REDCap consortium: Building an international  
30  
31 community of software platform partners. *J Biomed Inform*. 2019;95:103208.  
32  
33  
34  
35  
36  
37  
38  
39  
40  
41  
42  
43  
44  
45  
46  
47  
48  
49  
50  
51  
52  
53  
54  
55  
56  
57  
58  
59  
60

## Tables

Table 1. Baseline characteristics by treatment group

|                                          | Chlorhexidine             | Placebo                   | All Participants          |
|------------------------------------------|---------------------------|---------------------------|---------------------------|
|                                          | Mean $\pm$ SD<br>or N (%) | Mean $\pm$ SD<br>or N (%) | Mean $\pm$ SD<br>or N (%) |
| <b>Number of Randomised Participants</b> | <b>24</b>                 | <b>20</b>                 | <b>44</b>                 |
| Gender (% female)                        | 2 (8.3)                   | 1 (5.0)                   | 3 (6.8)                   |
| Age (years)                              | 67.6 $\pm$ 7.2            | 68.3 $\pm$ 6.0            | 67.9 $\pm$ 6.6            |
| Race non-white                           | 1 (4.2)                   | 1 (5.0)                   | 2 (4.5)                   |
| Season**                                 |                           |                           |                           |
| Spring                                   | 3 (15.0)                  | 6 (30.0)                  | 9 (22.5)                  |
| Summer                                   | 7 (35.0)                  | 4 (20.0)                  | 11 (27.5)                 |
| Fall                                     | 7 (35.0)                  | 6 (30.0)                  | 13 (32.5)                 |
| Winter                                   | 3 (15.0)                  | 4 (20.0)                  | 7 (17.5)                  |
| Years smoked                             | 40.8 $\pm$ 10.4           | 43.6 $\pm$ 10.3           | 42.0 $\pm$ 10.4           |
| Current smoker                           | 6 (25.0)                  | 7 (35.0)                  | 13 (29.5)                 |
| Pack Years                               | 58.7 $\pm$ 32.9           | 57.6 $\pm$ 39.8           | 58.2 $\pm$ 35.8           |
| SGRQ                                     | 49.2 $\pm$ 17.2           | 41.8 $\pm$ 12.3           | 45.8 $\pm$ 15.5           |
| FEV <sub>1</sub> % predicted             | 39.9 $\pm$ 12.6           | 43.8 $\pm$ 11.1           | 41.7 $\pm$ 12.0           |
| FVC % predicted                          | 66.2 $\pm$ 14.8           | 71.4 $\pm$ 12.9           | 68.5 $\pm$ 14.1           |
| COPD exacerbations (past 12 months)      | 2.3 $\pm$ 1.5             | 1.8 $\pm$ 1.0             | 2.1 $\pm$ 1.3             |
| COPD hospitalizations (past 12 months)   | 0.5 $\pm$ 0.7             | 0.7 $\pm$ 0.7             | 0.6 $\pm$ 0.7             |

\*\*Assigned to the season that covered >50% of the study period for a given participant.

Abbreviations: SD = Standard deviation; SGRQ = St. George's Respiratory Questionnaire; FEV<sub>1</sub> = Forced expiratory volume in one second; FVC = Forced vital capacity; COPD = Chronic obstructive pulmonary disease.

Table 2. Exacerbations, antibiotic use, or systemic steroid use during the study, excluding those withdrawn prior to study completion

|                                                | Chlorhexidine | Placebo   |
|------------------------------------------------|---------------|-----------|
|                                                | N(%)          | N(%)      |
| <b>No. of Randomised Participants Assessed</b> | <b>20</b>     | <b>20</b> |
| COPD Exacerbation <sup>1</sup>                 | 3 (15.0)      | 5 (25.0)  |
| Systemic steroid use <sup>2</sup>              | 1 (5.0)       | 5 (25.0)  |
| Antibiotic use <sup>3</sup>                    | 3 (15.0)      | 5 (25.0)  |

<sup>1</sup>Self-reported COPD exacerbation (worsening of chronic respiratory symptoms) during the study. One placebo subject reported an exacerbation but deferred any therapy until after study completion.

<sup>2</sup>Self-reported use of systemic corticosteroids during the study for any indication.

<sup>3</sup>Self-reported use of systemic antibiotics during the study for any indication. One placebo subject took antibiotics for a non-respiratory reason.

Abbreviations: COPD = Chronic obstructive pulmonary disease.

Table 3a. Biomass ( $\log_{10}$ ) from oral wash and sputum samples by treatment group

|                          | Oral Wash ( $\log_{10}$ molecules/ $\mu\text{L}/\text{mL}$ ) |              |                |              | Sputum ( $\log_{10}$ molecules/ $\mu\text{L}/\text{gram}$ ) |             |                |              |
|--------------------------|--------------------------------------------------------------|--------------|----------------|--------------|-------------------------------------------------------------|-------------|----------------|--------------|
|                          | Chlorhexidine (N=24)                                         |              | Placebo (N=20) |              | Chlorhexidine (N=24)                                        |             | Placebo (N=20) |              |
|                          | N                                                            | Mean (SD)    | N              | Mean (SD)    | N                                                           | Mean (SD)   | N              | Mean (SD)    |
| Biomass at Baseline      | 24                                                           | 5.22 (0.58)  | 20             | 5.38 (0.48)  | 21                                                          | 6.07 (1.15) | 13             | 6.66 (0.59)  |
| Biomass at Week 8        | 20                                                           | 4.94 (0.96)  | 20             | 5.24 (0.34)  | 17                                                          | 6.35 (1.04) | 15             | 6.31 (0.86)  |
| Change in biomass        | 20                                                           | -0.24 (1.00) | 20             | -0.14 (0.32) | 15                                                          | 0.42 (1.24) | 12             | -0.38 (1.13) |
| Excluding antibiotic use | Chlorhexidine (N=21)                                         |              | Placebo (N=15) |              | Chlorhexidine (N=19)                                        |             | Placebo (N=10) |              |
| Biomass at Baseline      | 21                                                           | 5.23 (0.61)  | 15             | 5.48 (0.48)  | 19                                                          | 6.14 (1.18) | 10             | 6.77 (0.55)  |
| Biomass at Week 8        | 17                                                           | 4.93 (1.04)  | 15             | 5.29 (0.37)  | 16                                                          | 6.39 (1.06) | 11             | 6.19 (0.97)  |
| Change in biomass        | 17                                                           | -0.26 (1.09) | 15             | -0.19 (0.31) | 14                                                          | 0.45 (1.28) | 9              | -0.62 (1.20) |

Abbreviations: SD = Standard deviation.

Table 3b. Biomass analysis results – Two-sample t-test on the  $\log_{10}$  change

| Two sample t-test on $\log_{10}$ change (CHL-PLA) | N TOT | N CHL | N PLA | Mean difference (SE) <sup>1</sup> | 95% CI        | t value | P-value |
|---------------------------------------------------|-------|-------|-------|-----------------------------------|---------------|---------|---------|
| All participants with available data              |       |       |       |                                   |               |         |         |
| Oral Wash Samples                                 | 40    | 20    | 20    | -0.103 (0.23)                     | (-0.59, 0.38) | -0.44   | 0.665   |
| Sputum Samples                                    |       |       |       |                                   |               |         |         |
| No imputation                                     | 27    | 15    | 12    | 0.80 (0.46)                       | (-0.15, 1.75) | 1.73    | 0.096   |
| Imputation <sup>2</sup>                           | 35    | 19    | 16    | 0.70 (0.39)                       | (-0.08, 1.47) | 1.76    | 0.078   |
| Excluding antibiotic use during study             |       |       |       |                                   |               |         |         |
| Oral Wash Samples                                 | 32    | 17    | 15    | -0.07 (0.29)                      | (-0.65, 0.51) | -0.25   | 0.808   |
| Sputum Samples                                    |       |       |       |                                   |               |         |         |
| No imputation                                     | 23    | 14    | 9     | 1.06 (0.53)                       | (-0.05, 2.17) | 1.99    | 0.060   |
| Imputation <sup>2</sup>                           | 28    | 16    | 12    | 0.98 (0.47)                       | (0.06, 1.89)  | 2.09    | 0.036   |

<sup>1</sup> Chlorhexidine group change in biomass minus placebo group.

<sup>2</sup> Imputation refers to the use of multiple imputation techniques to impute the 11 missing sputum weights.

Abbreviations: TOT = total, CHL = Chlorhexidine, PLA = Placebo, SE = Standard error, CI = Confidence interval.

Table 4. Linear regression results of the effect of treatment group on the change in biodiversity

| Outcome                                           | Linear Regression            |                |                    | Adjusted P-value <sup>1</sup> |
|---------------------------------------------------|------------------------------|----------------|--------------------|-------------------------------|
|                                                   | Predictor                    | Estimate(SE)   | Unadjusted P-value |                               |
| Shannon Diversity Index Change (Week 8- Baseline) |                              |                |                    |                               |
| Oral Wash (N=40)                                  | Treatment Group <sup>2</sup> | -0.349 (0.091) | 0.0005             | 0.0010                        |
|                                                   | Baseline Index               | -0.197 (0.073) | 0.0100             |                               |
| Sputum (N=35)                                     |                              |                |                    |                               |
|                                                   | Treatment Group              | -0.622 (0.169) | 0.0008             | 0.0010                        |
|                                                   | Baseline Index               | -0.312 (0.111) | 0.0083             |                               |
| Simpson Diversity Index Change (Week 8- Baseline) |                              |                |                    |                               |
| Oral Wash (N=40)                                  | Treatment Group              | -0.030 (0.008) | 0.0005             | 0.0010                        |
|                                                   | Baseline Index               | -0.196 (0.114) | 0.0938             |                               |
| Sputum (N=35)                                     |                              |                |                    |                               |
|                                                   | Treatment Group              | -0.091 (0.034) | 0.0123             | 0.0123                        |
|                                                   | Baseline Index               | -0.109 (0.179) | 0.5472             |                               |

<sup>1</sup>A Step-down Bonferroni p-value adjustment is made for the two comparisons (oral wash and sputum) within each Diversity Index.

<sup>2</sup>Treatment group is coded as Chlorhexidine = 1, Placebo = 0.

Table 5. Linear regression analysis of the effect of treatment group on secondary outcomes

| Outcome: 8-week Change <sup>3</sup> | Chlorhexidine (N=20) |              | Placebo (N=20) |             | Treatment Group <sup>1</sup> | P-value <sup>2</sup> |
|-------------------------------------|----------------------|--------------|----------------|-------------|------------------------------|----------------------|
|                                     | N                    | Mean ± SD    | N              | Mean ± SD   | Estimate (95% CI)            |                      |
| BCSS                                | 19                   | -0.3 ± 1.9   | 18             | -0.1 ± 1.5  | -0.28 (-1.45, 0.89)          | 0.630                |
| C-reactive Protein (mg/L)           | 20                   | 1.8 ± 7.5    | 20             | 0.4 ± 6.8   | 1.54 (-2.72, 5.80)           | 0.467                |
| Fibrinogen (mg/dL)                  | 19                   | 22.5 ± 77.8  | 20             | 10.0 ± 77.0 | 20.19 (-28.52, 68.91)        | 0.406                |
| Leukocytes (K/cmm)                  | 20                   | 0.2 ± 1.8    | 19             | 0.5 ± 1.8   | -0.32 (-1.42, 0.78)          | 0.560                |
| SGRQ Total Score                    | 20                   | -4.7 ± 8.0   | 20             | 1.7 ± 8.9   | -6.22 (-11.87, -0.57)        | 0.032                |
| Activity Domain                     | 20                   | -0.5 ± 9.1   | 20             | 3.9 ± 12.9  | -3.84 (-10.92, 3.24)         | 0.279                |
| Impacts Domain                      | 20                   | -5.4 ± 12.6  | 20             | 0.7 ± 10.0  | -5.46 (-12.92, 1.99)         | 0.146                |
| Symptoms Domain                     | 20                   | -10.1 ± 15.2 | 20             | 0.8 ± 18.8  | -6.81 (-17.82, 4.19)         | 0.217                |

<sup>1</sup>Treatment group is coded as Chlorhexidine = 1, Placebo = 0.

<sup>2</sup>The p-value is for the comparison of chlorhexidine vs. placebo.

<sup>3</sup>Each model is adjusted for the baseline value of each outcome.

Abbreviations: SD = Standard deviation; CI = Confidence interval; BCSS = Breathlessness, Cough and Sputum Scale; SGRQ = St. George's Respiratory Questionnaire.

Table 6. Adverse events by treatment group

|                                                          | Week 4 Phone Call          |           | Week 8 Visit  |           |
|----------------------------------------------------------|----------------------------|-----------|---------------|-----------|
|                                                          | Chlorhexidine <sup>1</sup> | Placebo   | Chlorhexidine | Placebo   |
| <b>Number of Randomized Participants</b>                 | <b>23</b>                  | <b>20</b> | <b>20</b>     | <b>20</b> |
| Irritation and/or sores of the lining of the mouth, N(%) | 0 (0.0)                    | 1 (5.0)   | 0 (0.0)       | 1 (5.3)   |
| Allergic reaction (swelling, rash, or hives), N(%)       | 0 (0.0)                    | 0 (0.0)   | 0 (0.0)       | 0 (0.0)   |
| Change in taste, N(%)                                    | 0 (0.0)                    | 0 (0.0)   | 0 (0.0)       | 0 (0.0)   |
| Discoloration of teeth, N(%)                             | 0 (0.0)                    | 0 (0.0)   | 0 (0.0)       | 1 (5.3)   |
| Other side effects, N(%) <sup>2,3</sup>                  | 2 (8.7)                    | 3 (15.0)  | 2 (11.1)      | 0 (0.0)   |

<sup>1</sup> Due to study withdrawals, adverse effects were assessed for 23 of 24 chlorhexidine participants at Week 4 and 20 of 24 at Week 8.

<sup>2</sup> Other adverse effects in the chlorhexidine group - dry mouth (1 patient at Week 4), feeling of loose teeth + cough + green tinged sputum (1 patient at Week 4), widening gaps in teeth (1 patient at Week 8) and blue tongue for 15-20 minutes after using drug (1 patient at Week 4), widening gaps in teeth (1 patient at Week 8) and blue tongue for 15-20 minutes after using drug (1 patient at Week 8).

<sup>3</sup> Other adverse effects in the Placebo group - increased congestion (1 patient at Week 4), sinus/nasal infection (1 patient at Week 4), and dry mouth/dry cough (1 patient at Week 4).

### Figure Legend

Figure 1. CLIMB study consort diagram. CLIMB assessed 511 individuals for eligibility. Of these, 467 were excluded and 44 were randomized. Four participants (all assigned to the chlorhexidine group) discontinued the study. Forty participants completed the study.

For peer review only



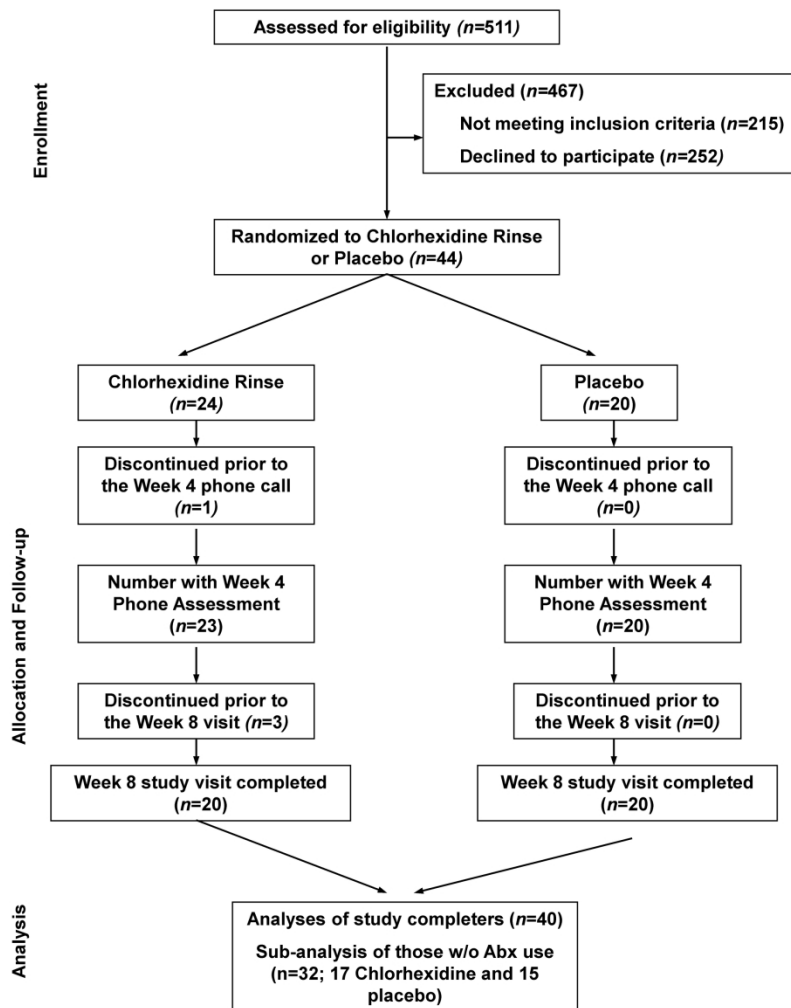

45 Figure 1. CLIMB study consort diagram. CLIMB assessed 511 individuals for eligibility. Of these, 467 were  
46 excluded and 44 were randomized. Four participants (all assigned to the chlorhexidine group) discontinued  
47 the study. Forty participants completed the study.

48 215x279mm (300 x 300 DPI)

1  
2  
3 Chlorhexidine oral rinses for symptomatic COPD: a randomized, blinded, placebo-controlled  
4 preliminary study  
5

6  
7 Alexa A. Pragman, Ann M. Fieberg, Cavan S. Reilly, and Chris H. Wendt  
8

9 Online Data Supplement  
10  
11  
12  
13  
14  
15  
16  
17  
18  
19  
20  
21  
22  
23  
24  
25  
26  
27  
28  
29  
30  
31  
32  
33  
34  
35  
36  
37  
38  
39  
40  
41  
42  
43  
44  
45  
46  
47  
48  
49  
50  
51  
52  
53  
54  
55  
56  
57  
58  
59  
60

## Supplemental Methods

### Study design

The chlorhexidine effect in the oral and lung microbiota study (CLIMB) is a randomized, blind, placebo-controlled, parallel-group preliminary study of the effects of chlorhexidine oral rinses on COPD. It was conducted at a single tertiary-care Veterans Affairs medical center (USA).

Ethics approval was granted by the Minneapolis Veterans Affairs Medical Center (MVAMC) Institutional Review Board (#4526-A) and all procedures adhered to the study protocol (available in supplementary information).

### Participants

Eligible CLIMB participants were those age 40-85 years receiving care at the MVAMC with a clinical diagnosis of COPD, a FEV<sub>1</sub>/FVC ratio (post-bronchodilator)  $\leq$  70%, FEV<sub>1</sub> (post-bronchodilator)  $\leq$  65%, current or former smokers with lifetime cigarette consumption of  $\geq$  10 pack-years, presence of  $\geq$  4 natural teeth, and the presence of high likelihood of a chronic cough and sputum production defined as one of the following: 1) self-report of either cough or sputum production occurring "several days per week" or "almost every day"; or 2) a COPD exacerbation within the previous 12 months (defined as taking antibiotics and/or prednisone for respiratory symptoms, being hospitalized, or visiting the emergency department for respiratory illness). Participants were excluded if they were pregnant, not fully recovered for at least 30 days from a COPD exacerbation, treated with antibiotics (for any indication) in the last two months, had an active oral infection (e.g., dental abscess), currently used chlorhexidine oral rinses, had a known allergy or sensitivity to chlorhexidine, or used supplemental oxygen.

1  
2  
3  
4  
5  
6 Presence of chronic cough, chronic sputum production, or COPD exacerbation in the last 12  
7  
8 months were used to enrich the study population with participants able to produce sputum and  
9  
10 to report respiratory symptoms. The presence of at least four natural teeth was used to  
11  
12 maintain consistency of the oral microbiota across participants, as the edentulous oral  
13  
14 microbiota is different from the dentate oral microbiota. Likewise, participants who had not  
15  
16 completely recovered from a COPD exacerbation, used antibiotics in the last two months, or  
17  
18 had a dental infection were excluded to ensure that microbiota samples were collected from  
19  
20 participants at their baseline.  
21  
22  
23  
24  
25  
26  
27

28 Participants were recruited from those visiting the Emergency Department or admitted to the  
29  
30 hospital for a COPD exacerbation, and among those participating in COPD case management  
31  
32 due to frequent COPD exacerbations. All participants provided written informed consent.  
33  
34  
35  
36  
37

### 38 Randomization and masking

39  
40 Participants were recruited by the study coordinator and randomly assigned (1:1) via a random  
41  
42 number generator to receive either 15 mL of twice-daily 0.12% oral chlorhexidine rinses  
43  
44 (PerioGard®)<sup>1</sup> or matched placebo mouth rinses for eight weeks. Randomization was not  
45  
46 stratified. Matched placebo was compounded by the research pharmacist and consisted of  
47  
48 sterile water with blue dye (FD&C#2), polysorbate, and sodium saccharin for flavoring. The  
49  
50 pharmacist conducted the allocation and assignment and was the only one unblinded to study  
51  
52 assignment. Study medications were dispensed directly to participants in identical opaque  
53  
54  
55  
56  
57  
58  
59  
60

1  
2  
3 bottles. Participants as well as those interacting with participants (study coordinator and  
4  
5 investigators) were blinded to group assignment during the conduct of the study. Investigators  
6  
7 adjudicated antibiotic use and exacerbations after unblinding, but these data were used for  
8  
9 post-hoc subgroup analyses and not in the primary or secondary outcome analyses.  
10  
11  
12  
13  
14

## 15 Procedures

16  
17 At visit 1, participants provided details of their medical history, performed spirometry,  
18  
19 completed the St. George's Respiratory Questionnaire (SGRQ), were instructed on how to  
20  
21 complete the Breathlessness, Cough, and Sputum Scale (BCSS)<sup>2</sup> daily diaries during the study,  
22  
23 and then provided blood, oral, and induced sputum samples prior to randomization. Blood  
24  
25 samples were used to determine white blood cell count and differential, fibrinogen, and C-  
26  
27 reactive protein (CRP). Oral and sputum samples were obtained after at least a two-hour fast.  
28  
29 Oral samples were obtained by swishing 15-mL sterile water in the mouth for 30 seconds and  
30  
31 then spitting the water into a sterile cup. Sputum induction was performed with nebulized 3%  
32  
33 saline (0.9% saline if FEV<sub>1</sub> <35%) for up to 20 minutes. Nebulization was terminated when  
34  
35 participants either expectorated a 5 mL sputum sample into a sterile cup, 20 minutes of  
36  
37 induction had elapsed, or the peak flow dropped to ≤ 80% of the baseline value. Unused sterile  
38  
39 water was collected for use as control samples in microbiota analyses. Oral and sputum sample  
40  
41 volumes were recorded. Using sterile technique, sputum samples were divided for cell count  
42  
43 and gram stain performed by the clinical microbiology laboratory and microbiota analyses  
44  
45 (including biomass quantification).  
46  
47  
48  
49  
50  
51  
52  
53  
54  
55  
56  
57  
58  
59  
60

1  
2  
3 Participants were instructed to swish 15 mL of the study medication (either 0.12%  
4  
5 chlorhexidine or placebo) in their mouth for 30 seconds twice daily (morning and evening)  
6  
7 followed by expectoration. The study mouth rinse was used twice daily for eight weeks.  
8  
9

10 Participants were told to avoid routine dental clinic visits during the study period.  
11  
12  
13

14  
15 After four weeks of study mouth rinse use, the study coordinator conducted a mid-study phone  
16  
17 call to assess for hospitalizations, Emergency Department visits, unplanned clinic visits, new  
18  
19 medication use (including antibiotics), compliance with the study drug, BCSS diary completion,  
20  
21 and to assess adverse events. Additional study drug was mailed to participants by the research  
22  
23 pharmacist following this phone call.  
24  
25  
26  
27  
28  
29

30 Eight weeks after randomization participants returned for a second study visit. They were  
31  
32 instructed not to use the study mouth rinse the morning of the visit. Participants returned  
33  
34 completed BCSS diaries and used study medication bottles to the study coordinator.  
35  
36

37 Participants again completed the SGRQ, completed questionnaires (assessing medication  
38  
39 changes, hospitalizations, Emergency Department visits, unplanned clinic visits, new medication  
40  
41 use), and provided samples (blood, oral rinses, and induced sputum) for biomarker and  
42  
43 microbiota analyses.  
44  
45  
46  
47  
48  
49

50 The BCSS (a daily diary for tracking the severity of respiratory symptoms) was started on Day 1,  
51  
52 the day of first treatment. Participants answered three symptom questions on a 0 to 4 scale  
53  
54 and a total daily score was calculated from those answers. Baseline BCSS score was the average  
55  
56  
57  
58  
59

1  
2  
3 of daily BCSS measurements from Days 1-7. Week 8 BCSS score was the average of daily BCSS  
4  
5 measurements from Days 50-56.  
6  
7  
8  
9

10 The SGRQ is a self-administered questionnaire that measures pulmonary disease-related quality  
11  
12 of life. It has been validated for use in many chronic lung diseases, including COPD.<sup>3</sup> The SGRQ  
13  
14 is scored on a scale of 0 to 100, with 100 reflecting the most severe symptoms. The minimum  
15  
16 clinically important difference in the SGRQ is widely accepted as being 4 units.<sup>4</sup>  
17  
18  
19  
20  
21  
22

23 The clinical laboratories at the MVAMC determined WBC and differential, fibrinogen, CRP  
24  
25 levels, and sputum gram stain and culture results. All oral rinses, sputum samples, and unused  
26  
27 sterile water (control samples) were frozen immediately and until DNA extraction. 16S rRNA  
28  
29 quantification and 16S rRNA V4 MiSeq sequencing was performed at the University of  
30  
31 Minnesota Genomics Center as previously described.<sup>5</sup>  
32  
33  
34  
35  
36  
37

### 38 Outcomes

39  
40 The primary study outcome was change in oral and sputum microbiota biomass after 8 weeks  
41  
42 of study medication use, compared to baseline values, in participants who used 0.12%  
43  
44 chlorhexidine oral rinses vs. placebo as assessed by 16S rRNA quantification. To adjust biomass  
45  
46 for the size of the sputum sample, raw counts were normalized by dividing by the sample  
47  
48 volume or mass. Secondary outcomes (all compared to baseline values in participants receiving  
49  
50 chlorhexidine vs. placebo) included: i) sputum and oral microbiota alpha diversity (as assessed  
51  
52 by Shannon and Simpson diversity); ii) sputum and oral microbiota taxonomy; iii) inflammatory  
53  
54  
55  
56  
57  
58  
59  
60

1  
2  
3 markers (WBC, fibrinogen, and CRP); iv) BCSS scores (week 8 vs. week 1); v) SGRQ score; and vi)  
4  
5 assessment of adverse events. Adverse events were assessed both during the mid-study phone  
6  
7 call and at the second visit by assessing hospitalizations, new medication use, and death.  
8  
9  
10 Participants were asked specifically about known adverse events associated with chlorhexidine  
11  
12 oral rinses (oral pain, decreased taste, and tooth discoloration) and open-ended questions  
13  
14 about new symptoms.  
15  
16

### 17 18 19 20 Statistical analysis

21  
22 The power analysis for the study examined the power to detect differences in lung microbiota  
23  
24 diversity as measured by the Simpson (1-D) diversity measure, ranging from 0.22 to 0.32  
25  
26 between the treatment groups using a two-sample t-test with equal variances. Our data  
27  
28 showed that age had a significant positive impact on Simpson diversity with a change in  
29  
30 diversity of 0.34 and the averaged standard deviation in the Simpson measure among moderate  
31  
32 and severely affected COPD patients of 0.281. If chlorhexidine were to have an effect size  
33  
34 similar to the effect of age with 20 participants per group, there was 67%, 75%, 81%, 87%, 91%,  
35  
36 and 94% power to detect a difference of 0.22, 0.24, 0.26, 0.28, 0.30, and 0.32 between  
37  
38 treatment groups.  
39  
40  
41  
42  
43  
44  
45  
46

47 Baseline variables were compared using Fisher's Exact Test for categorical variables or the  
48  
49 Wilcoxon Two-Sample Test for continuous variables. Means are presented with standard  
50  
51 deviations (SD); mean differences and parameter estimates are presented with their associated  
52  
53 standard error (SE).  
54  
55  
56  
57  
58  
59



1  
2  
3  
4  
5  
6 All analyses were performed using SAS version 9.4 (SAS Institute) and the intention-to-treat  
7  
8 principle. A two-sided type I error of 0.05 was used. Correction of the Type I error rate for  
9  
10 multiple testing was performed for the endpoints that report results from both oral wash and  
11  
12 sputum samples using the Step-down Bonferroni method.<sup>6</sup>  
13  
14  
15

16  
17  
18 For the primary analysis of both normalized oral wash and normalized sputum biomass count,  
19  
20 values were transformed to the  $\log_{10}$  scale and the mean difference between treatment groups  
21  
22 was compared using the two-sample t-test. Additionally, for the analysis of sputum biomass  
23  
24 count, a multiple imputation procedure was used to impute each unavailable sputum weight  
25  
26 (PROC MI with seed=501213, MCMC method, and acceptable value range of 0.01 to 2.5). For  
27  
28 each of the 25 datasets created by the procedure, the normalized biomass (count/mass) was  
29  
30 calculated, the values were transformed to the  $\log_{10}$  scale, and a t-test was performed. Lastly,  
31  
32 PROC MIANALYZE was used to obtain an estimate from the t-test that accounted for the  
33  
34 variability in the imputed values.  
35  
36  
37  
38  
39  
40  
41

42 Linear regression was used to examine the effect of treatment group on the 8-week change in  
43  
44 the Shannon and Simpson biodiversity indices, BCSS, SGRQ and inflammatory markers  
45  
46 separately, with each model adjusted for the baseline value of the measure.  
47  
48  
49  
50

51  
52 Subgroup analyses of participants who did not receive antibiotics during the study were also  
53  
54 performed for the outcomes of biomass and biodiversity.  
55  
56  
57  
58

1  
2  
3  
4  
5  
6 For taxa abundance analyses, the number of sequences assigned to each genus were  
7  
8 determined for each sputum and oral wash sample. Treatment effects on the abundance of  
9  
10 each genera were examined by modeling the 8-week change using linear regression, adjusted  
11  
12 for baseline count. We restricted the analyses to the genera with <20% of values equal to  
13  
14 zero. In addition, the proportion with organisms detected at Week 8 was compared between  
15  
16 treatment groups for each genus using Fisher's Exact Test. Results were corrected for multiple  
17  
18 comparisons.  
19  
20  
21  
22  
23  
24

25 A data monitoring committee did not oversee the study. The study was registered in  
26  
27 ClinicalTrials.gov as NCT02252588.  
28  
29  
30  
31

### 32 Role of funding source

33  
34 The funder of the study had no role in study design, data collection, data analysis, data  
35  
36 interpretation, or writing of the report. The corresponding author had full access to all the data  
37  
38 in the study and had final responsibility for the decision to submit for publication.  
39  
40  
41  
42  
43  
44  
45  
46

### 47 References

- 48  
49  
50  
51  
52  
53 1.  
54  
55 <https://www.google.com/url?sa=t&rct=j&q=&esrc=s&source=web&cd=&ved=2ahUKEwj5>  
56  
57  
58

1  
2  
3 uKeM3IzsAhXYWc0KHS4nCHYQFjAAegQIBBAB&url=https%3A%2F%2Fwww.accessdata.fda  
4  
5 .gov%2Fdrugsatfda\_docs%2Fnda%2Fpre96%2F73695\_PerioGard\_Prntlbl.pdf&usg=AOvVa  
6  
7 w16U5biulfx1TcGpyoeX\_wg.  
8  
9

10 https://www.accessdata.fda.gov/drugsatfda\_docs/nda/pre96/73695\_PerioGard\_Prntlbl.p  
11  
12 df. Accessed July 12, 2020.  
13  
14

- 15 2. Leidy NK, Rennard SI, Schmier J, Jones MK, Goldman M. The breathlessness, cough, and  
16 sputum scale: the development of empirically based guidelines for interpretation. *Chest*.  
17 2003;124(6):2182-2191.  
18  
19
- 20 3. Jones PW, Quirk FH, Baveystock CM. The St George's Respiratory Questionnaire. *Respir*  
21 *Med*. 1991;85 Suppl B:25-31; discussion 33.  
22  
23
- 24 4. Jones PW. St. George's Respiratory Questionnaire: MCID. *COPD*. 2005;2(1):75-79.  
25  
26
- 27 5. Pragman AA, Knutson KA, Gould TJ *et al*. Chronic obstructive pulmonary disease upper  
28 airway microbiome is associated with select clinical characteristics. *PLOS ONE*.  
29 2019;14(7):e0219962.  
30  
31
- 32 6. Holm S. A simple sequentially rejective multiple test procedure. *Scand J Stat*. 1979;6:65-  
33 70.  
34  
35  
36  
37  
38  
39  
40  
41  
42  
43  
44  
45  
46  
47  
48  
49  
50  
51  
52  
53  
54  
55  
56  
57  
58  
59

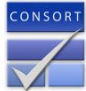

## CONSORT 2010 checklist of information to include when reporting a randomised trial\*

| Section/Topic                    | Item No | Checklist item                                                                                                                                                                              | Reported on page No |
|----------------------------------|---------|---------------------------------------------------------------------------------------------------------------------------------------------------------------------------------------------|---------------------|
| <b>Title and abstract</b>        |         |                                                                                                                                                                                             |                     |
|                                  | 1a      | Identification as a randomised trial in the title                                                                                                                                           | 5                   |
|                                  | 1b      | Structured summary of trial design, methods, results, and conclusions (for specific guidance see CONSORT for abstracts)                                                                     | 2                   |
| <b>Introduction</b>              |         |                                                                                                                                                                                             |                     |
| Background and objectives        | 2a      | Scientific background and explanation of rationale                                                                                                                                          | 4-5                 |
|                                  | 2b      | Specific objectives or hypotheses                                                                                                                                                           | 5                   |
| <b>Methods</b>                   |         |                                                                                                                                                                                             |                     |
| Trial design                     | 3a      | Description of trial design (such as parallel, factorial) including allocation ratio                                                                                                        | 5-6                 |
|                                  | 3b      | Important changes to methods after trial commencement (such as eligibility criteria), with reasons                                                                                          | 6                   |
| Participants                     | 4a      | Eligibility criteria for participants                                                                                                                                                       | 6                   |
|                                  | 4b      | Settings and locations where the data were collected                                                                                                                                        | 6                   |
| Interventions                    | 5       | The interventions for each group with sufficient details to allow replication, including how and when they were actually administered                                                       | 5-7                 |
| Outcomes                         | 6a      | Completely defined pre-specified primary and secondary outcome measures, including how and when they were assessed                                                                          | 7                   |
|                                  | 6b      | Any changes to trial outcomes after the trial commenced, with reasons                                                                                                                       | NA                  |
| Sample size                      | 7a      | How sample size was determined                                                                                                                                                              | 7                   |
|                                  | 7b      | When applicable, explanation of any interim analyses and stopping guidelines                                                                                                                | NA                  |
| <b>Randomisation:</b>            |         |                                                                                                                                                                                             |                     |
| Sequence generation              | 8a      | Method used to generate the random allocation sequence                                                                                                                                      | 6                   |
|                                  | 8b      | Type of randomisation; details of any restriction (such as blocking and block size)                                                                                                         | 6                   |
| Allocation concealment mechanism | 9       | Mechanism used to implement the random allocation sequence (such as sequentially numbered containers), describing any steps taken to conceal the sequence until interventions were assigned | 6                   |
| Implementation                   | 10      | Who generated the random allocation sequence, who enrolled participants, and who assigned participants to interventions                                                                     | 6                   |
| Blinding                         | 11a     | If done, who was blinded after assignment to interventions (for example, participants, care providers, those                                                                                | 6                   |

|    |                          |                                                             |                                                                                                                  |
|----|--------------------------|-------------------------------------------------------------|------------------------------------------------------------------------------------------------------------------|
| 1  |                          | assessing outcomes) and how                                 |                                                                                                                  |
| 2  | 11b                      | If relevant, description of the similarity of interventions | NA                                                                                                               |
| 3  | Statistical methods      | 12a                                                         | Statistical methods used to compare groups for primary and secondary outcomes                                    |
| 4  |                          | 12b                                                         | Methods for additional analyses, such as subgroup analyses and adjusted analyses                                 |
| 5  |                          |                                                             | 8                                                                                                                |
| 6  | <b>Results</b>           |                                                             |                                                                                                                  |
| 7  | Participant flow (a      | 13a                                                         | For each group, the numbers of participants who were randomly assigned, received intended treatment, and         |
| 8  | diagram is strongly      |                                                             | were analysed for the primary outcome                                                                            |
| 9  | recommended)             | 13b                                                         | For each group, losses and exclusions after randomisation, together with reasons                                 |
| 10 | Recruitment              | 14a                                                         | Dates defining the periods of recruitment and follow-up                                                          |
| 11 |                          | 14b                                                         | Why the trial ended or was stopped                                                                               |
| 12 |                          |                                                             | 9                                                                                                                |
| 13 | Baseline data            | 15                                                          | A table showing baseline demographic and clinical characteristics for each group                                 |
| 14 | Numbers analysed         | 16                                                          | For each group, number of participants (denominator) included in each analysis and whether the analysis was      |
| 15 |                          |                                                             | by original assigned groups                                                                                      |
| 16 |                          |                                                             | 9                                                                                                                |
| 17 | Outcomes and             | 17a                                                         | For each primary and secondary outcome, results for each group, and the estimated effect size and its            |
| 18 | estimation               |                                                             | precision (such as 95% confidence interval)                                                                      |
| 19 |                          | 17b                                                         | For binary outcomes, presentation of both absolute and relative effect sizes is recommended                      |
| 20 | Ancillary analyses       | 18                                                          | Results of any other analyses performed, including subgroup analyses and adjusted analyses, distinguishing       |
| 21 |                          |                                                             | pre-specified from exploratory                                                                                   |
| 22 |                          |                                                             | 11-13                                                                                                            |
| 23 | Harms                    | 19                                                          | All important harms or unintended effects in each group (for specific guidance see CONSORT for harms)            |
| 24 |                          |                                                             | 13                                                                                                               |
| 25 | <b>Discussion</b>        |                                                             |                                                                                                                  |
| 26 | Limitations              | 20                                                          | Trial limitations, addressing sources of potential bias, imprecision, and, if relevant, multiplicity of analyses |
| 27 | Generalisability         | 21                                                          | Generalisability (external validity, applicability) of the trial findings                                        |
| 28 | Interpretation           | 22                                                          | Interpretation consistent with results, balancing benefits and harms, and considering other relevant evidence    |
| 29 |                          |                                                             | 16-17                                                                                                            |
| 30 | <b>Other information</b> |                                                             |                                                                                                                  |
| 31 | Registration             | 23                                                          | Registration number and name of trial registry                                                                   |
| 32 |                          |                                                             | 3                                                                                                                |
| 33 | Protocol                 | 24                                                          | Where the full trial protocol can be accessed, if available                                                      |
| 34 |                          |                                                             | 3                                                                                                                |
| 35 | Funding                  | 25                                                          | Sources of funding and other support (such as supply of drugs), role of funders                                  |
| 36 |                          |                                                             | facepage                                                                                                         |

\*We strongly recommend reading this statement in conjunction with the CONSORT 2010 Explanation and Elaboration for important clarifications on all the items. If relevant, we also recommend reading CONSORT extensions for cluster randomised trials, non-inferiority and equivalence trials, non-pharmacological treatments, herbal interventions, and pragmatic trials. Additional extensions are forthcoming: for those and for up to date references relevant to this checklist, see [www.consort-statement.org](http://www.consort-statement.org).

# BMJ Open

## Chlorhexidine oral rinses for symptomatic COPD: a randomized, blind, placebo-controlled preliminary study

|                                 |                                                                                                                                                                                                                                                                                                                 |
|---------------------------------|-----------------------------------------------------------------------------------------------------------------------------------------------------------------------------------------------------------------------------------------------------------------------------------------------------------------|
| Journal:                        | <i>BMJ Open</i>                                                                                                                                                                                                                                                                                                 |
| Manuscript ID                   | bmjopen-2021-050271.R1                                                                                                                                                                                                                                                                                          |
| Article Type:                   | Original research                                                                                                                                                                                                                                                                                               |
| Date Submitted by the Author:   | 31-Aug-2021                                                                                                                                                                                                                                                                                                     |
| Complete List of Authors:       | Pragman, Alexa; Minneapolis VAHCS, Medicine; University of Minnesota Medical School Twin Cities<br>Fieberg, Ann; University of Minnesota Twin Cities<br>Reilly, Cavan; University of Minnesota Twin Cities<br>Wendt, Christine; Minneapolis VAHCS, Medicine; University of Minnesota Medical School Twin Cities |
| <b>Primary Subject Heading</b>: | Infectious diseases                                                                                                                                                                                                                                                                                             |
| Secondary Subject Heading:      | Respiratory medicine                                                                                                                                                                                                                                                                                            |
| Keywords:                       | MICROBIOLOGY, RESPIRATORY MEDICINE (see Thoracic Medicine), Chronic airways disease < THORACIC MEDICINE                                                                                                                                                                                                         |
|                                 |                                                                                                                                                                                                                                                                                                                 |

SCHOLARONE™  
Manuscripts



I, the Submitting Author has the right to grant and does grant on behalf of all authors of the Work (as defined in the below author licence), an exclusive licence and/or a non-exclusive licence for contributions from authors who are: i) UK Crown employees; ii) where BMJ has agreed a CC-BY licence shall apply, and/or iii) in accordance with the terms applicable for US Federal Government officers or employees acting as part of their official duties; on a worldwide, perpetual, irrevocable, royalty-free basis to BMJ Publishing Group Ltd ("BMJ") its licensees and where the relevant Journal is co-owned by BMJ to the co-owners of the Journal, to publish the Work in this journal and any other BMJ products and to exploit all rights, as set out in our [licence](#).

The Submitting Author accepts and understands that any supply made under these terms is made by BMJ to the Submitting Author unless you are acting as an employee on behalf of your employer or a postgraduate student of an affiliated institution which is paying any applicable article publishing charge ("APC") for Open Access articles. Where the Submitting Author wishes to make the Work available on an Open Access basis (and intends to pay the relevant APC), the terms of reuse of such Open Access shall be governed by a Creative Commons licence – details of these licences and which [Creative Commons](#) licence will apply to this Work are set out in our licence referred to above.

Other than as permitted in any relevant BMJ Author's Self Archiving Policies, I confirm this Work has not been accepted for publication elsewhere, is not being considered for publication elsewhere and does not duplicate material already published. I confirm all authors consent to publication of this Work and authorise the granting of this licence.

1  
2  
3 Word count (text): 3424

4 Word count (abstract): 297

5  
6  
7 Chlorhexidine oral rinses for symptomatic COPD: a randomized, blind, placebo-controlled  
8 preliminary study  
9

10 Running title: Chlorhexidine oral rinses for symptomatic COPD

11  
12  
13 Alexa A. Pragman, MD, PhD,<sup>1</sup> Ann M. Fieberg, MS,<sup>2</sup> Cavan S. Reilly, PhD,<sup>3</sup> and Christine H.  
14 Wendt, MD<sup>1</sup>

15 <sup>1</sup>Department of Medicine, Minneapolis Veterans Affairs Medical Center and University of  
16 Minnesota, Minneapolis, MN; <sup>2</sup>Coordinating Center for Biometric Research, University of  
17 Minnesota, Minneapolis, MN; <sup>3</sup>Division of Biostatistics, University of Minnesota, Minneapolis,  
18 MN.  
19

20 Corresponding author: Dr. Chris H. Wendt, Department of Medicine, Minneapolis Veterans  
21 Affairs Medical Center and University of Minnesota, Minneapolis, MN 55417;  
22 wendt005@umn.edu;  
23  
24

25 Summary of Conflict of Interest Statements: All authors report no conflicts.  
26

27  
28 Funding information: Flight Attendant Medical Research Institute (FAMRI) Clinical Innovator  
29 Award, (#150014 to CHW); Department of Veterans Affairs Office of Research and Development  
30 (1IK2CX001095 to AAP).  
31

32 Prior presentation: This work was previously presented virtually at IDWeek 2020 (October 21,  
33 2020).  
34  
35  
36  
37  
38  
39  
40  
41  
42  
43  
44  
45  
46  
47  
48  
49  
50  
51  
52  
53  
54  
55  
56  
57  
58  
59  
60



## Abbreviations

|        |                                                                |
|--------|----------------------------------------------------------------|
| BCSS   | Breathlessness, Cough, and Sputum Scale                        |
| CLIMB  | chlorhexidine effect in the oral and lung microbiota study     |
| COPD   | chronic obstructive pulmonary disease                          |
| CRP    | c-reactive protein                                             |
| FEV1   | forced expiratory volume in the first second                   |
| FEV1pp | forced expiratory volume in the first second percent predicted |
| MVAMC  | Minneapolis Veterans Affairs Medical Center                    |
| SD     | standard deviation                                             |
| SE     | standard error                                                 |
| SGRQ   | St. George's Respiratory Questionnaire                         |
| WBC    | white blood cell count                                         |

## Abstract

Objectives: Determine the effect of twice-daily chlorhexidine oral rinses on oral and lung microbiota biomass and respiratory symptoms.

Setting: Single center.

Participants: Participants were aged 40-85 with COPD and chronic productive cough or COPD exacerbation within the last year. Exclusions included antibiotics in the previous 2 months and/or those with less than four teeth. Forty-four participants were recruited and 40 completed the study.

Intervention: Participants were randomized 1:1 to twice-daily 0.12% chlorhexidine oral rinses vs. placebo for two months along with daily diaries. SGRQ, blood tests, oral rinse and induced sputum were collected at randomization and the final visit.

Primary and Secondary Outcomes: Primary outcome was a change in oral and sputum microbiota biomass. Secondary outcomes included: sputum and oral microbiota Shannon and Simpson diversity and taxonomy; inflammatory markers; BCSS and SGRQ scores.

Results: Neither the oral microbiota nor the sputum microbiota biomass decreased significantly in those using chlorhexidine compared with placebo (oral microbiota mean  $\log_{10}$  difference [SE] = -0.103 [0.23], 95% CI: -0.59, 0.38,  $p=0.665$ ; sputum microbiota 0.80 [0.46], 95% CI: -0.15, 1.75,  $p=0.096$ ). Chlorhexidine decreased both oral and sputum microbiota alpha (Shannon) diversity (linear regression estimate [SE] oral: -0.349 [0.091],  $p=0.001$ ; sputum -0.622 [0.169],  $p=0.001$ ).

Chlorhexidine use did not decrease systemic inflammatory markers compared to placebo (CRP [chlorhexidine  $1.8 \pm 7.5$  vs. placebo  $0.4 \pm 6.8$ ,  $p=0.467$ ], fibrinogen [ $22.5 \pm 77.8$  vs.  $10.0 \pm 77.0$ ,  $p=0.406$ ], or leukocytes [ $0.2 \pm 1.8$  vs.  $0.5 \pm 1.8$ ,  $p=0.560$ ]). Chlorhexidine use decreased St.

1  
2  
3 George's Respiratory Questionnaire scores compared to placebo (chlorhexidine  $-4.7 \pm 8.0$  vs.  
4  
5 placebo  $1.7 \pm 8.9$ ,  $p=0.032$ ).

6  
7  
8 Conclusions: We did not detect a significant difference in microbiota biomass due to  
9  
10 chlorhexidine use. Chlorhexidine decreased oral and sputum microbiota alpha diversity and  
11  
12 improved respiratory health-related quality of life compared to placebo.  
13  
14

15 Clinical Trial Registration: ClinicalTrials.gov NCT02252588  
16  
17

### 18 19 20 Strengths and Limitations of this Study

- 21  
22 • Using a randomized control design, this study will provide the first example of the  
23  
24 effects of altering the oral microbiome in the setting of COPD.  
25  
26
- 27  
28 • A study intervention that is simple, inexpensive, and has few side effects.  
29
- 30  
31 • Our study was limited by its relatively small sample size and single-center design.  
32
- 33  
34 • Other limitations include our inability to distinguish between live and dead bacteria in  
35  
36 our samples.  
37  
38  
39  
40  
41  
42  
43  
44  
45  
46  
47  
48  
49  
50  
51  
52  
53  
54  
55  
56  
57  
58  
59  
60

## Introduction

Chronic obstructive pulmonary disease (COPD) is the 3<sup>rd</sup>-leading cause of death worldwide and a significant cause of morbidity and mortality.<sup>1</sup> COPD symptoms such as chronic cough, sputum production, breathlessness, and wheezing lead to decreased quality of life. COPD exacerbations are a major cause of this morbidity. Medications such as bronchodilators and anti-inflammatory medications modestly reduce COPD exacerbations but have not effectively improved symptoms as assessed by health status. Approximately 50% of COPD exacerbations are attributed to bacteria<sup>2, 3</sup> and patients with COPD often remain colonized with bacteria in their lower respiratory tracts even during periods of stable disease.<sup>3</sup> These bacteria make up the lung microbiota. Recent evidence supports that the oral microbiota is the main source of the lung microbiota.<sup>4, 5</sup> The COPD lung microbiota also correlates with COPD exacerbation frequency.<sup>6</sup> No studies have yet been conducted that seek to alter the COPD microbiota biomass using common and safe medications with only mild side effects.

Chlorhexidine is a topical antiseptic that is FDA-approved for use as an oral rinse.<sup>7</sup> It binds to bacterial cell walls and exerts bacteriostatic and bacteriocidal effects; it is broadly active against Gram positive and Gram negative bacteria as well as yeasts. In oral rinses it reduces dental plaque, gingivitis, periodontitis, and decreases oral bacteria after dental extractions or trauma. In meta-analysis, chlorhexidine oral rinses have been shown to reduce the risk of ventilator-associated pneumonia.<sup>8</sup> It is well-tolerated, with known side effects consisting of mild oral discomfort, transient decrease in taste, and tooth discoloration (particularly with tea or coffee consumption).

1  
2  
3  
4  
5  
6 Randomized controlled trials of chlorhexidine oral rinses for dental diseases have shown some  
7  
8 possible decrease in oral bacterial biomass,<sup>9, 10</sup> decrease in specific oral pathogens,<sup>10</sup> and  
9  
10 decreased alpha diversity of the oral microbiota.<sup>11</sup> Oral chlorhexidine use results in an  
11  
12 immediate and sustained decrease in oral bacteria viability.<sup>12</sup>  
13  
14  
15

16  
17  
18 There is compelling evidence that chlorhexidine oral rinses improve oral health and are safe  
19  
20 and well-tolerated. The oral microbiota is the source of the lung microbiota likely due to  
21  
22 microaspiration. Among those with COPD, the oral and sputum microbiota correlate with COPD  
23  
24 exacerbation frequency.<sup>6</sup> Oral treatment with chlorhexidine alters the oral microbiota, which  
25  
26 may subsequently alter the lung microbiota and COPD-related symptoms. Our primary aim was  
27  
28 to determine the effect of twice-daily chlorhexidine oral rinses on oral and lung microbiota  
29  
30 biomass in participants with COPD.  
31  
32  
33  
34  
35  
36  
37  
38  
39

## 40 **Methods**

41  
42 The chlorhexidine effect in the oral and lung microbiota study (CLIMB) is a randomized, blind,  
43  
44 placebo-controlled, parallel-group preliminary study of the effects of chlorhexidine oral rinses  
45  
46 on COPD. It was conducted at a single tertiary-care Veterans Affairs medical center (USA).  
47  
48 Ethics approval was granted by the Minneapolis Veterans Affairs Medical Center (MVAMC)  
49  
50 Institutional Review Board (#4526-A; ClinicalTrials.gov NCT02252588), all participants provided  
51  
52 written consent, and all procedures adhered to the study protocol. A data monitoring  
53  
54  
55  
56  
57  
58  
59  
60

1  
2  
3 committee did not oversee the study. All data relevant to the study are included in the article.  
4  
5 Protocol and additional methods are provided in an online data supplement, and the dataset is  
6  
7 available in Dryad.<sup>13</sup>  
8  
9

### 10 11 12 13 Patient and public involvement

14  
15 The design of this study was based on previous randomized clinical trials designed for COPD  
16  
17 exacerbations. We further received input from expert clinicians and researchers within the  
18  
19 COPD Clinical Research Network. Patients with COPD were not involved in the development of  
20  
21 the protocol, but participant feedback was obtained during the study.  
22  
23  
24

### 25 26 27 28 Study Protocol:

29  
30 Eligible participants were invited to participate in the study and consisted of those age 40-85  
31  
32 years with a diagnosis of COPD and the presence or high likelihood of a chronic cough and  
33  
34 sputum production. Participants were excluded if they were not fully recovered for at least 30  
35  
36 days from a COPD exacerbation or were treated with antibiotics in the last two months.  
37  
38  
39

40  
41  
42 Participants were assigned (1:1) via a random number generator to receive either 15 mL of  
43  
44 twice-daily 0.12% oral chlorhexidine rinses (PerioGard®)<sup>7</sup> or matched placebo mouth rinses for  
45  
46 eight weeks. The pharmacist conducted the allocation and assignment and was the only staff  
47  
48 member unblinded to study assignment. Study data were collected and managed using REDCap  
49  
50 electronic data capture tools hosted at the University of Minnesota.<sup>14, 15</sup>  
51  
52  
53  
54  
55  
56  
57  
58

1  
2  
3 At visit 1, participants provided medical history, performed spirometry, completed the St.  
4 George's Respiratory Questionnaire (SGRQ),<sup>16, 17</sup> were instructed on how to complete the  
5 Breathlessness, Cough, and Sputum Scale (BCSS)<sup>18</sup> daily diaries, and provided blood, oral, and  
6 induced sputum samples prior to randomization. Oral and sputum sample volumes were  
7 recorded. Sputum production was heterogeneous across participants and samples, so sputum  
8 sample 16S copy numbers were normalized to (i.e., divided by) sputum sample mass. Oral  
9 sample size also varied due to variations in expectoration efficiency and were therefore also  
10 normalized to oral sample mass. Participants returned 8 weeks later to return BCSS diaries,  
11 complete the SGRQ, assess outcomes, and provide blood, oral, and sputum samples.  
12  
13  
14  
15  
16  
17  
18  
19  
20  
21  
22  
23  
24  
25  
26  
27

28 The clinical laboratories at the MVAMC determined WBC and differential, fibrinogen, CRP  
29 levels, and sputum gram stain and culture results. All oral rinses, sputum samples, and unused  
30 sterile water (control samples) were frozen immediately and until DNA extraction. 16S rRNA  
31 quantification and 16S rRNA V4 MiSeq sequencing was performed at the University of  
32 Minnesota Genomics Center as previously described.<sup>19</sup>  
33  
34  
35  
36  
37  
38  
39  
40  
41

#### 42 Outcomes and Power Analysis:

43  
44 The primary outcome was change in oral and sputum microbiota biomass after 8 weeks of  
45 chlorhexidine vs. placebo use, compared to baseline values as assessed by 16S rRNA  
46 quantification. The primary outcome was chosen based on the mechanism of action of  
47 chlorhexidine, however sample size calculations were based on a change in alpha diversity (a  
48 secondary outcome) due to data availability at study initiation. At a sample size of 20 per group  
49  
50  
51  
52  
53  
54  
55  
56  
57  
58  
59  
60

1  
2  
3 and across a plausible range of effect sizes, our study had 67-94% power to detect a change in  
4  
5 alpha diversity associated with chlorhexidine use. Sample size calculations are available in the  
6  
7 online supplement, and a rarefaction curve is provided in Figure S1. Secondary outcomes  
8  
9 included: sputum and oral microbiota Shannon and Simpson diversity; sputum and oral  
10  
11 microbiota taxonomy; inflammatory markers (WBC, fibrinogen, and CRP); BCSS scores; SGRQ  
12  
13 score; and assessment of adverse events.  
14  
15  
16  
17  
18  
19

#### 20 Statistical Analysis:

21  
22 Baseline variables were compared using Fisher's Exact Test for categorical variables or the  
23  
24 Wilcoxon Two-Sample Test for continuous variables. Means are presented with standard  
25  
26 deviations (SD); mean differences and parameter estimates are presented with their associated  
27  
28 standard error (SE).  
29  
30  
31  
32  
33  
34

35 All analyses were performed using SAS version 9.4 (SAS Institute) and the intention-to-treat  
36  
37 principle. A two-sided type I error of 0.05 was used. Correction of the Type I error rate for  
38  
39 multiple testing was performed using the Step-down Bonferroni method.<sup>20</sup>  
40  
41  
42  
43  
44

45 For the primary analysis of both normalized oral wash and normalized sputum biomass count,  
46  
47 values were transformed to the  $\log_{10}$  scale and the mean difference between treatment groups  
48  
49 was compared using the two-sample t-test. A multiple imputation procedure was used to  
50  
51 impute each unavailable sputum weight.  
52  
53  
54  
55  
56  
57  
58  
59  
60



1  
2  
3 The primary data analysis included all those who completed the study, with baseline and mid-  
4  
5 study phone call data included for non-completers when available. A sub-analysis of the  
6  
7 microbiota data was conducted after excluding samples obtained from participants who used  
8  
9 antibiotics during the study period.  
10  
11  
12  
13  
14  
15  
16  
17

18 Linear regression was used to examine the effect of treatment group on the 8-week change in  
19  
20 the Shannon and Simpson biodiversity indices, BCSS, SGRQ and inflammatory markers  
21  
22 separately, with each model adjusted for the baseline value of the measure.  
23  
24  
25  
26  
27

28 Subgroup analyses of participants who did not receive antibiotics during the study were also  
29  
30 performed for the outcomes of biomass and biodiversity.  
31  
32  
33  
34

35 For taxa abundance analyses, treatment effects on abundance were examined by modeling the  
36  
37 8-week change using linear regression, adjusted for baseline count. Analysis was restricted to  
38  
39 genera with <20% of values equal to zero. Fisher's Exact Test was used to determine the  
40  
41 proportion with a genus detected at Week 8 vs. baseline compared between treatment  
42  
43 groups. Results were corrected for multiple comparisons.  
44  
45  
46  
47  
48  
49  
50  
51

## 52 **Results**

53  
54  
55  
56  
57  
58  
59  
60

1  
2  
3 CLIMB assessed 511 participants for eligibility, excluded 215 because they did not meet criteria,  
4  
5  
6 252 declined to participate, and 44 were randomized to study medication. Participants were  
7  
8 recruited between September 8, 2014 and May 30, 2019 and the study ended when 40  
9  
10 participants completed the 8-week study. Four participants (all randomized to chlorhexidine)  
11  
12 discontinued the study, leaving 20 participants in each group who completed the study. One  
13  
14 participant withdrew without using any study medication, while the other 3 were lost to follow  
15  
16 up (Figure 1).  
17  
18  
19  
20  
21  
22

23 Of the 44 CLIMB participants, 41 (93%) were male and 42 (95%) were Caucasian. The mean age  
24  
25 was 67.9 years and mean tobacco exposure was 58.2 pack-years. Most were former tobacco  
26  
27 users (31, 70%) and the remainder were current smokers. High blood pressure (31, 70%) and  
28  
29 coronary artery disease (27, 61%) were reported by most participants. Mean FEV<sub>1</sub> % predicted  
30  
31 (FEV<sub>1pp</sub>) was 41.7% and the mean number of COPD exacerbations reported in the prior 12  
32  
33 months was 2.1. Baseline mean SGRQ score was 45.8. No baseline characteristics differed  
34  
35 significantly by treatment group (Table 1).  
36  
37  
38  
39  
40  
41

42 The number of participants experiencing a COPD exacerbation or using an antibiotic or oral  
43  
44 corticosteroid during the study period are presented in Table 2. Eight participants (3 in the  
45  
46 chlorhexidine group, 5 in the placebo group) received antibiotics during the study; most but not  
47  
48 all antibiotic use was for a respiratory indication. No participants experienced more than one  
49  
50 exacerbation, more than one course of antibiotics, or more than one course of oral  
51  
52 corticosteroids during the study.  
53  
54  
55  
56  
57  
58  
59  
60

1  
2  
3  
4  
5  
6 Our primary outcome was a change in oral and sputum microbiota biomass during the study  
7  
8 period as assessed by 16S rRNA copy numbers. Oral rinse samples were available for 40  
9  
10 participants (20 per group). There was a decrease in biomass in both groups; the mean  $\pm$  SD  
11  
12 changes were  $-0.24 \pm 1.0$  and  $-0.14 \pm 0.32$  in the chlorhexidine and placebo groups respectively  
13  
14 (Table S1). The mean difference between treatment groups (active-placebo) was not significant  
15  
16 (mean diff [SE] =  $-0.103 [0.23]$ , 95% Confidence Interval [CI]:  $[-0.59, 0.38]$ ,  $p=0.665$ ). Very  
17  
18 similar results were seen in the subgroup that did not use antibiotics during the study (N=32,  
19  
20 mean diff [SE] =  $-0.07 [0.29]$ , 95% CI:  $[-0.65, 0.51]$ ,  $p=0.808$ ) (Table 3).  
21  
22  
23  
24  
25  
26  
27

28 For the analysis of biomass in sputum samples, 5 chlorhexidine and 4 placebo participants were  
29  
30 unable to provide sputum samples; 2 were unable at Baseline, 6 were unable at Week 8  
31  
32 (including the 4 withdrawals), and one was unable at both Baseline and Week 8. Among the 35  
33  
34 sputum samples, there were 11 missing sputum weight values (6 at Baseline, 5 at Week 8)  
35  
36 among 4 placebo and 4 chlorhexidine participants. Table 3 shows the primary analysis results  
37  
38 using a two-sample t-test with the normalized data available (N=27) and using a multiple  
39  
40 imputation procedure to estimate the missing sputum weights (N=35). The two analysis  
41  
42 methods provide similar results. Although we hypothesized that the estimate would be  
43  
44 negative, indicating that the active group saw a larger decrease in biomass from Baseline to  
45  
46 Week 8 than the placebo group, without imputation we see a non-significant effect in the  
47  
48 opposite direction (mean  $\log_{10}$  difference[SE] =  $0.80 [0.46]$ , 95% CI =  $[-0.15, 1.75]$ ,  $p=0.096$ ) and  
49  
50 similarly with imputation (mean  $\log_{10}$  difference[SE] =  $0.70 [0.39]$ , 95% CI =  $[-0.08, 1.47]$ ,  
51  
52  
53  
54  
55  
56  
57  
58  
59  
60

1  
2  
3 p=0.078). These results were supported by the subgroup analyses of those without antibiotic  
4 use during the study. Although the p-value for the imputation analysis is significant (p=0.036)  
5 and the effect is not in the hypothesized direction, this result should be interpreted with  
6 caution due to the large number of tests reviewed here.  
7  
8  
9  
10  
11  
12

13  
14  
15 Linear regression was used to examine the 8-week change in each biodiversity index (Shannon  
16 and Simpson Indices) as a function of treatment group and adjusted for the value of the index  
17 at baseline (Table 4). As hypothesized, those in the chlorhexidine group saw, on average, a  
18 significant decrease in the diversity indices in comparison to those in the placebo group. For  
19 the oral wash samples, those in the treatment group had a coefficient of -0.349 (SE=0.091, adj.  
20 p=0.001) for the Shannon diversity index and -0.030 (SE=0.008, adj. p=0.001) for the Simpson  
21 diversity index. The results were similar for sputum samples: -0.622 (SE=0.169, adj. p=0.001)  
22 for the Shannon diversity index and -0.091 (SE=0.034, adj. p=0.0123) for the Simpson diversity  
23 index. Very similar results for both oral wash and sputum alpha diversity were seen in the  
24 subgroup that did not use antibiotics during the study, indicating that the decrease in diversity  
25 with chlorhexidine use was not related to antibiotic use (Table S2).  
26  
27  
28  
29  
30  
31  
32  
33  
34  
35  
36  
37  
38  
39  
40  
41  
42  
43  
44

45 For the additional secondary outcomes, the effect of treatment group on the 8-week change  
46 was examined using linear regression, adjusted for the measure at baseline (Table 5 and Table  
47 S3). There was no significant difference between treatment groups over the 8-week study  
48 period in BCSS score (mean change in the chlorhexidine and placebo groups respectively  $\pm$  SD: -  
49  $0.3 \pm 1.9$  vs.  $-0.1 \pm 1.5$ , estimate [95% CI] =  $-0.28 [-1.45, 0.89]$ , p=0.630), CRP ( $1.8 \pm 7.5$  vs.  $0.4 \pm$   
50  
51  
52  
53  
54  
55  
56  
57  
58  
59  
60

1  
2  
3 6.8, 1.54 [-2.72, 5.80],  $p=0.467$ ), fibrinogen ( $22.5 \pm 77.8$  vs.  $10.0 \pm 77.0$ , 20.19 [-28.52, 68.91],  
4  
5  $p=0.406$ ), or leukocytes ( $0.2 \pm 1.8$  vs.  $0.5 \pm 1.8$ , -0.32 [-1.42, 0.78],  $p=0.560$ ). Participants in the  
6  
7 chlorhexidine group showed a significantly larger decrease in SGRQ total score when compared  
8  
9 with the placebo group (mean change  $\pm$  SD:  $-4.7 \pm 8.0$  vs.  $1.7 \pm 8.9$ , -6.22 [-11.87, -0.57],  
10  
11  $p=0.032$ ). This difference was not evidenced in any one SGRQ domain.  
12  
13  
14  
15  
16  
17

18 In exploratory analyses, we evaluated the taxonomic composition of samples to assess for  
19  
20 chlorhexidine-associated changes in the microbiota. Among sputum samples there were 42  
21  
22 genera. The results of the linear regression analyses showed that only *Corynebacterium*  
23  
24 sequences were less abundant after chlorhexidine use compared with placebo (mean change in  
25  
26 the chlorhexidine and placebo groups respectively  $\pm$  SD:  $-197 \pm 342$  vs.  $12 \pm 337$ , estimate [95%  
27  
28 CI] = -282 [-438, -126], adjusted  $p=0.0378$ ). Among oral wash samples there were 43 genera.  
29  
30 Only *Lachnoanaerobaculum* sequences were less abundant after chlorhexidine use compared  
31  
32 to placebo (mean change in the chlorhexidine and placebo groups respectively  $\pm$  SD:  $-313 \pm 483$   
33  
34 vs.  $216 \pm 509$ , estimate [95% CI] = -521 [-815, -226], adjusted  $p=0.043$ ). Follow up analyses  
35  
36 relying on the presence or absence of sequences (rather than relative abundance) produced  
37  
38 similar results.  
39  
40  
41  
42  
43  
44  
45  
46

47 Very few adverse events were experienced over the course of the study (Table S4).  
48  
49  
50  
51  
52  
53

## 54 Discussion

55  
56  
57  
58  
59  
60

1  
2  
3 In this preliminary study, twice-daily chlorhexidine oral rinses decreased oral and sputum  
4  
5 microbiota alpha diversity and improved pulmonary disease-related quality of life compared to  
6  
7 placebo among those with symptomatic COPD. Chlorhexidine oral rinses did not appear to  
8  
9 decrease the oral or sputum microbiota biomass, our primary outcome, compared to placebo  
10  
11 as assessed by normalized 16S rRNA quantitative PCR. Furthermore, during the 8-week  
12  
13 treatment period chlorhexidine did not appear to decrease systemic inflammation or COPD  
14  
15 symptoms, as assessed by the BCSS, compared to placebo. Our preliminary study had limited  
16  
17 statistical power to detect several of our secondary endpoints; therefore, our results cannot  
18  
19 definitively exclude a relationship between chlorhexidine use and systemic inflammation or  
20  
21 symptoms.  
22  
23  
24  
25  
26  
27  
28  
29

30 We chose a change in biomass as our primary endpoint as we hypothesized that twice daily  
31  
32 chlorhexidine would have its largest effect on microbiota biomass. However, we did not detect  
33  
34 a significant decrease in biomass as a result of chlorhexidine use utilizing quantitative PCR.  
35  
36

37 Chlorhexidine is known to be bactericidal and previous work has identified a decrease in viable  
38  
39 bacteria following chlorhexidine oral use compared to water.<sup>12</sup> Our total DNA extraction  
40  
41 technique coupled with PCR-based biomass determination is unable to distinguish between live  
42  
43 and dead bacteria. It is therefore possible that chlorhexidine decreased the number of live  
44  
45 bacteria in the oral and sputum microbiota, and that our PCR-based biomass determination  
46  
47 technique was unable to distinguish between live bacterial biomass and dead bacteria.  
48  
49  
50

51 Furthermore, both groups experienced some decrease in biomass during the study period.  
52  
53  
54  
55  
56  
57  
58  
59

1  
2  
3 Changes in dental care habits, including twice-daily oral rinsing with either study drug or  
4  
5 placebo, may be responsible for this decrease.  
6  
7  
8  
9

10 Although total microbiota biomass did not appear to change, oral and sputum microbiota alpha  
11  
12 diversity decreased as a result of chlorhexidine use. The healthy lung and oral microbiota  
13  
14 generally demonstrate greater alpha diversity than the microbiota found in disease states such  
15  
16 as COPD or cystic fibrosis.<sup>21</sup> Whether this association is due to frequent use of antibiotics  
17  
18 among those with chronic lung disease or due to the chronic lung disease itself remains  
19  
20 unknown. Loss of alpha diversity due to chlorhexidine use may seem paradoxical given our  
21  
22 current understanding of the relationship between low alpha diversity and worsening lung  
23  
24 symptoms, however the current disease model does not differentiate between alpha diversity  
25  
26 *per se* and the mechanisms by which it may be manipulated. Loss of alpha diversity due to  
27  
28 chlorhexidine use, antibiotic use, or chronic lung inflammation likely represent clinically distinct  
29  
30 entities.  
31  
32  
33  
34  
35  
36  
37  
38  
39

40 Use of chlorhexidine oral rinses vs. placebo did not result in decreased systemic inflammation  
41  
42 as evidenced by CRP, fibrinogen and WBC values. These three systemic markers of  
43  
44 inflammation are often elevated among those with symptomatic COPD.<sup>22</sup> In light of our other  
45  
46 findings linking chlorhexidine use to microbiota alterations and improved respiratory-related  
47  
48 quality of life, we had expected that chlorhexidine use would lead to decreased systemic  
49  
50 inflammation. It is possible that chlorhexidine use improved local inflammation (in the lungs or  
51  
52  
53  
54  
55  
56  
57  
58  
59  
60

1  
2  
3 mouth) without resulting in systemic inflammatory changes. Sustained use over a longer time  
4  
5 period may be needed in order to observe systemic anti-inflammatory effects.  
6  
7  
8  
9

10 Although chlorhexidine use did not result in significant changes to BCSS scores, respiratory  
11 health-related quality of life did improve with use of chlorhexidine oral rinses vs. placebo during  
12 the 8-week intervention. SGRQ scores improved significantly among the chlorhexidine group  
13 relative to the placebo group, with a mean improvement (4.7 points) that is clinically  
14 meaningful (minimum clinically important difference of 4 points). The SGRQ encompasses 3  
15 sub-scores for activity, impacts, and symptoms.<sup>16</sup> No sub-score reached statistical significance,  
16 indicating that chlorhexidine use improved quality of life broadly, and was not due to isolated  
17 improvements in one or two SGRQ sub-domains. Our data support the further study of  
18 chlorhexidine oral rinses among symptomatic patients with COPD to improve respiratory  
19 health-related quality of life.  
20  
21  
22  
23  
24  
25  
26  
27  
28  
29  
30  
31  
32  
33  
34  
35  
36  
37  
38  
39  
40  
41  
42  
43  
44

45 In an exploratory analysis of the effects of chlorhexidine use on the sputum and oral  
46 microbiota, the only genus-level changes in DNA abundance were a decrease in  
47 *Corynebacterium* in sputum and a decrease in *Lachnoanaerobaculum* in oral rinses.  
48  
49

50 Chlorhexidine is known to broadly decrease the viability of bacteria and yeast.<sup>12</sup> Our microbiota  
51 analysis techniques, which cannot differentiate between DNA from “live” or “dead” organisms,  
52 therefore may be relatively insensitive to the effects of chlorhexidine. We were unable to  
53 detect overall changes in bacterial biomass or broad changes to individual genera among those  
54 using chlorhexidine compared with placebo. It is possible that broader assessments of the  
55  
56  
57  
58  
59  
60



1  
2  
3 community composition, such as alpha diversity, are better able to detect chlorhexidine-related  
4  
5 changes.  
6  
7  
8  
9

10 Our preliminary study had several strengths and limitations. Its strengths include a study  
11  
12 intervention that is simple, inexpensive, and has few side effects; the randomized and blinded  
13  
14 nature of the study; and objective assessment of outcomes. Our study was limited by its  
15  
16 relatively small sample size and use of a secondary endpoint to determine statistical power, our  
17  
18 homogeneous patient population, and our single-center design. In addition, other limitations  
19  
20 include our inability to distinguish between live and dead bacteria in our samples, incomplete  
21  
22 sample weights, lack of assessment of local inflammation, and limited in-person follow up while  
23  
24 on study drug. Future larger clinical trials will determine if the beneficial effects of  
25  
26 chlorhexidine oral rinses can be sustained among COPD subjects, and the biological  
27  
28 mechanisms for these improvements in quality of life.  
29  
30  
31  
32  
33  
34  
35  
36  
37

38 Although we did not find a difference in daily respiratory symptoms as measured with the BCSS,  
39  
40 we found a significant improvement in quality of life as measured by the SGRQ. This potential  
41  
42 discrepancy likely arose because BCSS focuses solely on respiratory symptoms,<sup>18</sup> while the  
43  
44 SGRQ also assesses the broader impacts of COPD symptoms on quality of life.<sup>16</sup> There was no  
45  
46 single domain within the SGRQ that drove this result, but there was improvement in both the  
47  
48 impacts and symptoms domains. We propose that oral chlorhexidine rinses improve respiratory  
49  
50 health-related quality of life by decreasing the number of live oral bacteria, altering the content  
51  
52 of the live oral microbiota, or both. Changes to the oral microbiota may decrease the lung  
53  
54  
55  
56  
57  
58  
59  
60

1  
2  
3 inflammation that occurs following aspiration or change the composition of the lung microbiota  
4  
5 itself and lead to an improved sense of wellness.  
6  
7  
8  
9

10 An additional clinical trial is needed to confirm our clinical endpoint findings with a larger group  
11  
12 of participants and evaluate the mechanistic links between chlorhexidine, viable bacterial  
13  
14 biomass, the microbiota, and respiratory health-related quality of life in symptomatic patients  
15  
16 with COPD.  
17  
18  
19  
20  
21  
22

23 Our data indicate that the use of twice-daily chlorhexidine oral rinses among symptomatic  
24  
25 patients with COPD improves quality of life. This was a secondary outcome in our study and  
26  
27 warrants validation in a larger clinical trial. Our intervention is relatively easy to implement,  
28  
29 inexpensive, and well-tolerated.  
30  
31  
32  
33  
34  
35  
36  
37  
38  
39  
40  
41  
42  
43  
44  
45  
46  
47  
48  
49  
50  
51  
52  
53  
54  
55  
56  
57  
58  
59  
60

## Acknowledgements

We gratefully acknowledge Ms. Susan Johnson (study coordinator), Mr. Shane Hodgson and Ms. Allison Zank (laboratory technicians), Dr. Douglas DeCarolis (research pharmacist), and Mr. Trevor J. Gould (bioinformatician). The views expressed in this article are those of the authors and do not reflect the views of the United States Government, the Department of Veterans Affairs, the funders, the sponsors, or any of the authors' affiliated academic institutions.

Study data were collected and managed using REDCap electronic data capture tools hosted at the University of Minnesota. REDCap (Research Electronic Data Capture) is a secure, web-based software platform designed to support data capture for research studies, providing 1) an intuitive interface for validated data capture; 2) audit trails for tracking data manipulation and export procedures; 3) automated export procedures for seamless data downloads to common statistical packages; and 4) procedures for data integration and interoperability with external sources.

Guarantor statement: Dr. Wendt is the guarantor of the content of the manuscript, including the data and analysis.

Author Contributions: AAP supervised research laboratory work, critically reviewed the data analyses, and wrote the first draft with input from AMF. AMF performed the statistical analyses with supervision from CSR, contributed to the first draft, and created the figure and tables. CSR supervised the statistical analyses and critically reviewed the manuscript. CHW obtained

1  
2  
3 funding, supervised subject recruitment, critically reviewed the data analysis, and critically  
4  
5 reviewed the manuscript.  
6

7  
8 Financial/nonfinancial disclosures: All authors report no conflicts of interests.  
9

10 Role of the sponsors: The sponsors had no role in the design, conduct, analysis, or  
11  
12 interpretation of the data.  
13

14  
15  
16 Ethics statements

17 Patient consent for publication

18 Not required.  
19

20  
21 Ethics approval

22 Minneapolis Veterans Affairs Medical Center (MVAMC) Institutional Review Board (#4526-A)  
23

24  
25 Data availability statement:

26  
27 Extra data can be accessed via the Dryad data repository at <http://datadryad.org/> with the

28  
29 doi:10.5061/dryad.m0cfxpp37  
30  
31  
32  
33  
34  
35  
36  
37  
38  
39  
40  
41  
42  
43  
44  
45  
46  
47  
48  
49  
50  
51  
52  
53  
54  
55  
56  
57  
58  
59  
60

## References

1. <https://www.who.int/news-room/fact-sheets/detail/the-top-10-causes-of-death>.  
<https://www.who.int/news-room/fact-sheets/detail/the-top-10-causes-of-death>.  
Accessed July 12, 2020.
2. Sethi S, Maloney J, Grove L, Wrona C, Berenson CS. Airway inflammation and bronchial bacterial colonization in chronic obstructive pulmonary disease. *Am J Respir Crit Care Med*. 2006;173(9):991-998.
3. Sethi S, Murphy TF. Bacterial infection in chronic obstructive pulmonary disease in 2000: a state-of-the-art review. *Clinical Microbiology Reviews*. 2001;14(2):336-+.
4. Pragman AA, Lyu T, Baller JA *et al*. The lung tissue microbiota of mild and moderate chronic obstructive pulmonary disease. *Microbiome*. 2018;6(1):e47305.
5. Bassis CM, Erb-Downward JR, Dickson RP *et al*. Analysis of the upper respiratory tract microbiotas as the source of the lung and gastric microbiotas in healthy individuals. *MBio*. 2015;6(2):e00037.
6. Pragman AA, Knutson KA, Gould TJ, Isaacson RE, Reilly CS, Wendt CH. Chronic obstructive pulmonary disease upper airway microbiota alpha diversity is associated with exacerbation phenotype: a case-control observational study. *Respir Res*. 2019;20(1):114.
7. [https://www.google.com/url?sa=t&rct=j&q=&esrc=s&source=web&cd=&ved=2ahUKEwj5uKeM3IzsAhXYWc0KHS4nCHYQFjAAegQIBBAB&url=https%3A%2F%2Fwww.accessdata.fda.gov%2Fdrugsatfda\\_docs%2Fnda%2Fpre96%2F73695\\_PerioGard\\_Prntlbl.pdf&usg=AOvVaw16U5biulfx1TcGpyoeX\\_wg](https://www.google.com/url?sa=t&rct=j&q=&esrc=s&source=web&cd=&ved=2ahUKEwj5uKeM3IzsAhXYWc0KHS4nCHYQFjAAegQIBBAB&url=https%3A%2F%2Fwww.accessdata.fda.gov%2Fdrugsatfda_docs%2Fnda%2Fpre96%2F73695_PerioGard_Prntlbl.pdf&usg=AOvVaw16U5biulfx1TcGpyoeX_wg).

- 1  
2  
3 [https://www.accessdata.fda.gov/drugsatfda\\_docs/nda/pre96/73695\\_PerioGard\\_Prntlbl.p](https://www.accessdata.fda.gov/drugsatfda_docs/nda/pre96/73695_PerioGard_Prntlbl.pdf)  
4  
5  
6 df. Accessed July 12, 2020.  
7
- 8 8. Hua F, Xie H, Worthington HV, Furness S, Zhang Q, Li C. Oral hygiene care for critically ill  
9  
10 patients to prevent ventilator-associated pneumonia. *Cochrane Database Syst Rev*.  
11  
12 2016;10:CD008367.  
13
- 14 9. Becerik S, Türkoğlu O, Emingil G, Vural C, Ozdemir G, Atilla G. Antimicrobial effect of  
15  
16 adjunctive use of chlorhexidine mouthrinse in untreated gingivitis: a randomized, placebo-  
17  
18 controlled study. *APMIS*. 2011;119(6):364-372.  
19  
20
- 21 10. Persson GR, Yeates J, Persson RE, Hirschi-Imfeld R, Weibel M, Kiyak HA. The impact of a  
22  
23 low-frequency chlorhexidine rinsing schedule on the subgingival microbiota (the TEETH  
24  
25 clinical trial). *J Periodontol*. 2007;78(9):1751-1758.  
26  
27
- 28 11. Al-Kamel A, Baraniya D, Al-Hajj WA *et al*. Subgingival microbiome of experimental  
29  
30 gingivitis: shifts associated with the use of chlorhexidine and N-acetyl cysteine  
31  
32 mouthwashes. *J Oral Microbiol*. 2019;11(1):1608141.  
33  
34
- 35 12. Quintas V, Prada-López I, Donos N, Suárez-Quintanilla D, Tomás I. In situ neutralisation of  
36  
37 the antibacterial effect of 0.2% Chlorhexidine on salivary microbiota: Quantification of  
38  
39 substantivity. *Arch Oral Biol*. 2015;60(8):1109-1116.  
40  
41
- 42 [dataset] 13. Pragman AA, Fieberg A, Reilly CS, Wendt CH. Data from: Chlorhexidine oral  
43  
44 rinses for symptomatic COPD: a randomized, blind, placebo-controlled preliminary  
45  
46 study. Dryad Digital Repository, February 16, 2021.  
47  
48  
49  
50  
51 <https://doi.org/10.5061/dryad.m0cfxpp37>  
52  
53  
54  
55  
56  
57  
58  
59  
60

14. Harris PA, Taylor R, Thielke R, Payne J, Gonzalez N, Conde JG. Research electronic data capture (REDCap)--a metadata-driven methodology and workflow process for providing translational research informatics support. *J Biomed Inform.* 2009;42(2):377-381.
15. Harris PA, Taylor R, Minor BL *et al.* The REDCap consortium: Building an international community of software platform partners. *J Biomed Inform.* 2019;95:103208.
16. Jones PW, Quirk FH, Baveystock CM. The St George's Respiratory Questionnaire. *Respir Med.* 1991;85 Suppl B:25-31; discussion 33.
17. Jones PW. St. George's Respiratory Questionnaire: MCID. *COPD.* 2005;2(1):75-79.
18. Leidy NK, Rennard SI, Schmier J, Jones MK, Goldman M. The breathlessness, cough, and sputum scale: the development of empirically based guidelines for interpretation. *Chest.* 2003;124(6):2182-2191.
19. Pragman AA, Knutson KA, Gould TJ *et al.* Chronic obstructive pulmonary disease upper airway microbiome is associated with select clinical characteristics. *PLOS ONE.* 2019;14(7):e0219962.
20. Holm S. A simple sequentially rejective multiple test procedure. *Scand J Stat.* 1979;6:65-70.
21. Segal LN, Rom WN, Weiden MD. Lung Microbiome for Clinicians. New Discoveries about Bugs in Healthy and Diseased Lungs. *Ann Am Thorac Soc.* 2014;11(1):108-16.
22. Celli BR, Locantore N, Yates J *et al.* Inflammatory biomarkers improve clinical prediction of mortality in chronic obstructive pulmonary disease. *AJRCCM.* 2012;185(10):1065-72.

## Tables

Table 1. Baseline characteristics by treatment group

|                                          | Chlorhexidine             | Placebo                   | All Participants          |
|------------------------------------------|---------------------------|---------------------------|---------------------------|
|                                          | Mean $\pm$ SD<br>or N (%) | Mean $\pm$ SD<br>or N (%) | Mean $\pm$ SD<br>or N (%) |
| <b>Number of Randomised Participants</b> | <b>24</b>                 | <b>20</b>                 | <b>44</b>                 |
| Gender (% female)                        | 2 (8.3)                   | 1 (5.0)                   | 3 (6.8)                   |
| Age (years)                              | 67.6 $\pm$ 7.2            | 68.3 $\pm$ 6.0            | 67.9 $\pm$ 6.6            |
| Race non-white                           | 1 (4.2)                   | 1 (5.0)                   | 2 (4.5)                   |
| Season**                                 |                           |                           |                           |
| Spring                                   | 3 (15.0)                  | 6 (30.0)                  | 9 (22.5)                  |
| Summer                                   | 7 (35.0)                  | 4 (20.0)                  | 11 (27.5)                 |
| Fall                                     | 7 (35.0)                  | 6 (30.0)                  | 13 (32.5)                 |
| Winter                                   | 3 (15.0)                  | 4 (20.0)                  | 7 (17.5)                  |
| Years smoked                             | 40.8 $\pm$ 10.4           | 43.6 $\pm$ 10.3           | 42.0 $\pm$ 10.4           |
| Current smoker                           | 6 (25.0)                  | 7 (35.0)                  | 13 (29.5)                 |
| Pack Years                               | 58.7 $\pm$ 32.9           | 57.6 $\pm$ 39.8           | 58.2 $\pm$ 35.8           |
| SGRQ                                     | 49.2 $\pm$ 17.2           | 41.8 $\pm$ 12.3           | 45.8 $\pm$ 15.5           |
| FEV <sub>1</sub> % predicted             | 39.9 $\pm$ 12.6           | 43.8 $\pm$ 11.1           | 41.7 $\pm$ 12.0           |
| FVC % predicted                          | 66.2 $\pm$ 14.8           | 71.4 $\pm$ 12.9           | 68.5 $\pm$ 14.1           |
| COPD exacerbations (past 12 months)      | 2.3 $\pm$ 1.5             | 1.8 $\pm$ 1.0             | 2.1 $\pm$ 1.3             |
| COPD hospitalizations (past 12 months)   | 0.5 $\pm$ 0.7             | 0.7 $\pm$ 0.7             | 0.6 $\pm$ 0.7             |

\*\*Assigned to the season that covered >50% of the study period for a given participant.

Abbreviations: SD = Standard deviation; SGRQ = St. George's Respiratory Questionnaire; FEV<sub>1</sub> = Forced expiratory volume in one second; FVC = Forced vital capacity; COPD = Chronic obstructive pulmonary disease.

Table 2. Exacerbations, antibiotic use, or systemic steroid use during the study, excluding those withdrawn prior to study completion

|                                                | Chlorhexidine | Placebo   |
|------------------------------------------------|---------------|-----------|
|                                                | N(%)          | N(%)      |
| <b>No. of Randomised Participants Assessed</b> | <b>20</b>     | <b>20</b> |
| COPD Exacerbation <sup>1</sup>                 | 3 (15.0)      | 5 (25.0)  |
| Systemic steroid use <sup>2</sup>              | 1 (5.0)       | 5 (25.0)  |
| Antibiotic use <sup>3</sup>                    | 3 (15.0)      | 5 (25.0)  |

<sup>1</sup>Self-reported COPD exacerbation (worsening of chronic respiratory symptoms) during the study. One placebo subject reported an exacerbation but deferred any therapy until after study completion.

<sup>2</sup>Self-reported use of systemic corticosteroids during the study for any indication.

<sup>3</sup>Self-reported use of systemic antibiotics during the study for any indication. One placebo subject took antibiotics for a non-respiratory reason.

Abbreviations: COPD = Chronic obstructive pulmonary disease.



Table 3. Biomass analysis results – Two-sample t-test on the log<sub>10</sub> change

| <b>Two sample t-test on log<sub>10</sub> change (CHL-PLA)</b> | <b>N TOT</b> | <b>N CHL</b> | <b>N PLA</b> | <b>Mean difference (SE)<sup>1</sup></b> | <b>95% CI</b> | <b>t value</b> | <b>P-value</b> |
|---------------------------------------------------------------|--------------|--------------|--------------|-----------------------------------------|---------------|----------------|----------------|
| All participants with available data                          |              |              |              |                                         |               |                |                |
| Oral Wash Samples                                             | 40           | 20           | 20           | -0.103 (0.23)                           | (-0.59, 0.38) | -0.44          | 0.665          |
| Sputum Samples                                                |              |              |              |                                         |               |                |                |
| No imputation                                                 | 27           | 15           | 12           | 0.80 (0.46)                             | (-0.15, 1.75) | 1.73           | 0.096          |
| Imputation <sup>2</sup>                                       | 35           | 19           | 16           | 0.70 (0.39)                             | (-0.08, 1.47) | 1.76           | 0.078          |
| Excluding antibiotic use during study                         |              |              |              |                                         |               |                |                |
| Oral Wash Samples                                             | 32           | 17           | 15           | -0.07 (0.29)                            | (-0.65, 0.51) | -0.25          | 0.808          |
| Sputum Samples                                                |              |              |              |                                         |               |                |                |
| No imputation                                                 | 23           | 14           | 9            | 1.06 (0.53)                             | (-0.05, 2.17) | 1.99           | 0.060          |
| Imputation <sup>2</sup>                                       | 28           | 16           | 12           | 0.98 (0.47)                             | (0.06, 1.89)  | 2.09           | 0.036          |

<sup>1</sup> Chlorhexidine group change in biomass minus placebo group.

<sup>2</sup> Imputation refers to the use of multiple imputation techniques to impute the 11 missing sputum weights.

Abbreviations: TOT = total, CHL = Chlorhexidine, PLA = Placebo, SE = Standard error, CI = Confidence interval.

Table 4. Linear regression results of the effect of treatment group on the change in biodiversity

| Outcome                                           | Linear Regression            |                |                    | Adjusted P-value <sup>1</sup> |
|---------------------------------------------------|------------------------------|----------------|--------------------|-------------------------------|
|                                                   | Predictor                    | Estimate(SE)   | Unadjusted P-value |                               |
| Shannon Diversity Index Change (Week 8- Baseline) |                              |                |                    |                               |
| Oral Wash (N=40)                                  | Treatment Group <sup>2</sup> | -0.349 (0.091) | 0.0005             | 0.0010                        |
|                                                   | Baseline Index               | -0.197 (0.073) | 0.0100             |                               |
| Sputum (N=35)                                     |                              |                |                    |                               |
|                                                   | Treatment Group              | -0.622 (0.169) | 0.0008             | 0.0010                        |
|                                                   | Baseline Index               | -0.312 (0.111) | 0.0083             |                               |
| Simpson Diversity Index Change (Week 8- Baseline) |                              |                |                    |                               |
| Oral Wash (N=40)                                  | Treatment Group              | -0.030 (0.008) | 0.0005             | 0.0010                        |
|                                                   | Baseline Index               | -0.196 (0.114) | 0.0938             |                               |
| Sputum (N=35)                                     |                              |                |                    |                               |
|                                                   | Treatment Group              | -0.091 (0.034) | 0.0123             | 0.0123                        |
|                                                   | Baseline Index               | -0.109 (0.179) | 0.5472             |                               |

<sup>1</sup>A Step-down Bonferroni p-value adjustment is made for the two comparisons (oral wash and sputum) within each Diversity Index.

<sup>2</sup>Treatment group is coded as Chlorhexidine = 1, Placebo = 0.

Table 5. Linear regression analysis of the effect of treatment group on secondary outcomes

| Outcome: 8-week Change <sup>3</sup> | Chlorhexidine (N=20) |              | Placebo (N=20) |            | Treatment Group <sup>1</sup> | P-value <sup>2</sup> |
|-------------------------------------|----------------------|--------------|----------------|------------|------------------------------|----------------------|
|                                     | N                    | Mean ± SD    | N              | Mean ± SD  | Estimate (95% CI)            |                      |
| BCSS                                | 19                   | -0.3 ± 1.9   | 18             | -0.1 ± 1.5 | -0.28 (-1.45, 0.89)          | 0.630                |
| SGRQ Total Score                    | 20                   | -4.7 ± 8.0   | 20             | 1.7 ± 8.9  | -6.22 (-11.87, -0.57)        | 0.032                |
| Activity Domain                     | 20                   | -0.5 ± 9.1   | 20             | 3.9 ± 12.9 | -3.84 (-10.92, 3.24)         | 0.279                |
| Impacts Domain                      | 20                   | -5.4 ± 12.6  | 20             | 0.7 ± 10.0 | -5.46 (-12.92, 1.99)         | 0.146                |
| Symptoms Domain                     | 20                   | -10.1 ± 15.2 | 20             | 0.8 ± 18.8 | -6.81 (-17.82, 4.19)         | 0.217                |

<sup>1</sup>Treatment group is coded as Chlorhexidine = 1, Placebo = 0.

<sup>2</sup>The p-value is for the comparison of chlorhexidine vs. placebo.

<sup>3</sup>Each model is adjusted for the baseline value of each outcome.

Abbreviations: SD = Standard deviation; CI = Confidence interval; BCSS = Breathlessness, Cough and Sputum Scale; SGRQ = St. George's Respiratory Questionnaire.

**Figure Legend**

Figure 1. CLIMB study consort diagram. CLIMB assessed 511 individuals for eligibility. Of these, 467 were excluded and 44 were randomized. Four participants (all assigned to the chlorhexidine group) discontinued the study. Forty participants completed the study.

For peer review only

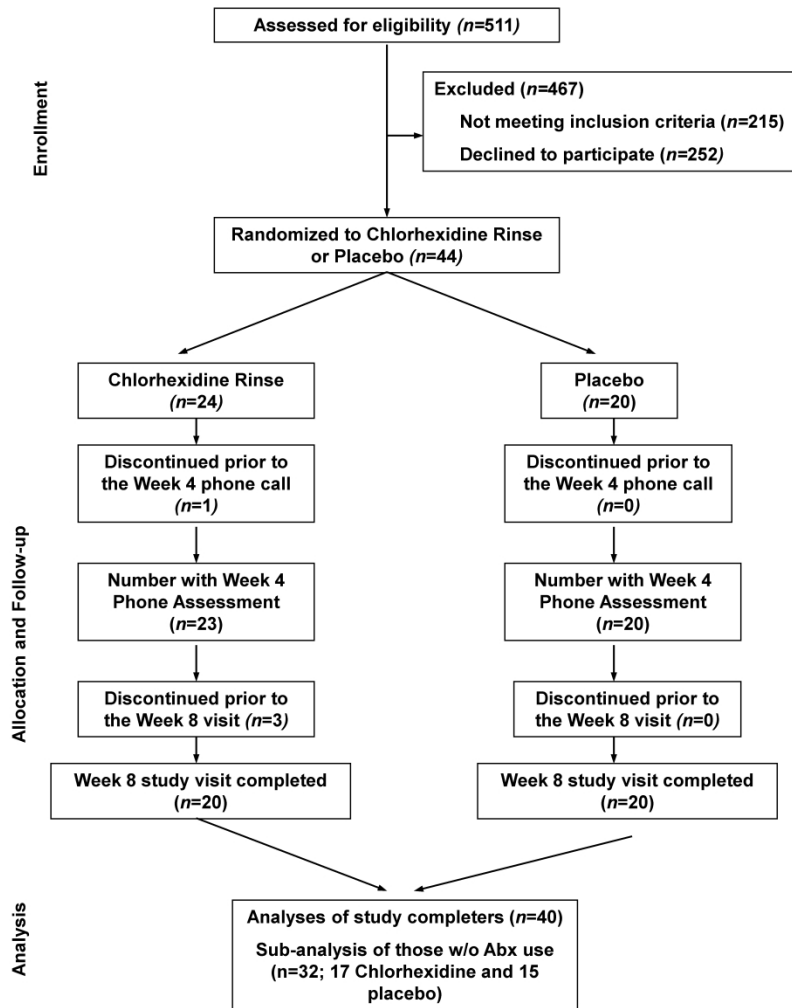

Figure 1. CLIMB study consort diagram. CLIMB assessed 511 individuals for eligibility. Of these, 467 were excluded and 44 were randomized. Four participants (all assigned to the chlorhexidine group) discontinued the study. Forty participants completed the study.

215x279mm (600 x 600 DPI)

1  
2  
3  
4  
5  
6  
7  
8  
9  
10  
11  
12  
13  
14  
15  
16  
17  
18  
19  
20  
21  
22  
23  
24  
25  
26  
27  
28  
29  
30  
31  
32  
33  
34  
35  
36  
37  
38  
39  
40  
41  
42  
43  
44  
45  
46  
47  
48  
49  
50  
51  
52  
53  
54  
55  
56  
57  
58  
59  
60

Chlorhexidine oral rinses for symptomatic COPD: a randomized, blinded, placebo-controlled preliminary study

Alexa A. Pragman, Ann M. Fieberg, Cavan S. Reilly, and Christine H. Wendt

Online Data Supplement

For peer review only

## Supplemental Methods

### Study design

The chlorhexidine effect in the oral and lung microbiota study (CLIMB) is a randomized, blind, placebo-controlled, parallel-group preliminary study of the effects of chlorhexidine oral rinses on COPD. It was conducted at a single tertiary-care Veterans Affairs medical center (USA).

Ethics approval was granted by the Minneapolis Veterans Affairs Medical Center (MVAMC) Institutional Review Board (#4526-A) and all procedures adhered to the study protocol (available in supplementary information).

### Participants

Eligible CLIMB participants were those age 40-85 years receiving care at the MVAMC with a clinical diagnosis of COPD, a FEV<sub>1</sub>/FVC ratio (post-bronchodilator) ≤ 70%, FEV<sub>1</sub> (post-bronchodilator) ≤ 65%, current or former smokers with lifetime cigarette consumption of ≥ 10 pack-years, presence of ≥ 4 natural teeth, and the presence of high likelihood of a chronic cough and sputum production defined as one of the following: 1) self-report of either cough or sputum production occurring “several days per week” or “almost every day”; or 2) a COPD exacerbation within the previous 12 months (defined as taking antibiotics and/or prednisone for respiratory symptoms, being hospitalized, or visiting the emergency department for respiratory illness). Participants were excluded if they were pregnant, not fully recovered for at least 30 days from a COPD exacerbation, treated with antibiotics (for any indication) in the last two months, had an active oral infection (e.g., dental abscess), currently used chlorhexidine oral rinses, had a known allergy or sensitivity to chlorhexidine, or used supplemental oxygen.

1  
2  
3  
4  
5  
6 Presence of chronic cough, chronic sputum production, or COPD exacerbation in the last 12  
7  
8 months were used to enrich the study population with participants able to produce sputum and  
9  
10 to report respiratory symptoms. The presence of at least four natural teeth was used to  
11  
12 maintain consistency of the oral microbiota across participants, as the edentulous oral  
13  
14 microbiota is different from the dentate oral microbiota. Likewise, participants who had not  
15  
16 completely recovered from a COPD exacerbation, used antibiotics in the last two months, or  
17  
18 had a dental infection were excluded to ensure that microbiota samples were collected from  
19  
20 participants at their baseline.  
21  
22  
23  
24  
25  
26  
27

28 Participants were recruited from those visiting the Emergency Department or admitted to the  
29  
30 hospital for a COPD exacerbation, and among those participating in COPD case management  
31  
32 due to frequent COPD exacerbations. All participants provided written informed consent.  
33  
34  
35  
36  
37

### 38 Randomization and masking

39  
40 Participants were recruited by the study coordinator and randomly assigned (1:1) via a random  
41  
42 number generator to receive either 15 mL of twice-daily 0.12% oral chlorhexidine rinses  
43  
44 (PerioGard®)<sup>1</sup> or matched placebo mouth rinses for eight weeks. Randomization was not  
45  
46 stratified. Matched placebo was compounded by the research pharmacist and consisted of  
47  
48 sterile water with blue dye (FD&C#2), polysorbate, and sodium saccharin for flavoring. The  
49  
50 pharmacist conducted the allocation and assignment and was the only one unblinded to study  
51  
52 assignment. Study medications were dispensed directly to participants in identical opaque  
53  
54  
55  
56  
57  
58  
59  
60

1  
2  
3 bottles. Participants as well as those interacting with participants (study coordinator and  
4  
5 investigators) were blinded to group assignment during the conduct of the study. Investigators  
6  
7 adjudicated antibiotic use and exacerbations after unblinding, but these data were used for  
8  
9 post-hoc subgroup analyses and not in the primary or secondary outcome analyses.  
10  
11  
12  
13  
14

## 15 Procedures

16  
17 At visit 1, participants provided details of their medical history, performed spirometry,  
18  
19 completed the St. George's Respiratory Questionnaire (SGRQ), were instructed on how to  
20  
21 complete the Breathlessness, Cough, and Sputum Scale (BCSS)<sup>2</sup> daily diaries during the study,  
22  
23 and then provided blood, oral, and induced sputum samples prior to randomization. Blood  
24  
25 samples were used to determine white blood cell count and differential, fibrinogen, and C-  
26  
27 reactive protein (CRP). Oral and sputum samples were obtained after at least a two-hour fast.  
28  
29 Oral samples were obtained by swishing 15-mL sterile water in the mouth for 30 seconds and  
30  
31 then spitting the water into a sterile cup. Sputum induction was performed with nebulized 3%  
32  
33 saline (0.9% saline if FEV<sub>1</sub> <35%) for up to 20 minutes. Nebulization was terminated when  
34  
35 participants either expectorated a 5 mL sputum sample into a sterile cup, 20 minutes of  
36  
37 induction had elapsed, or the peak flow dropped to ≤ 80% of the baseline value. Unused sterile  
38  
39 water was collected for use as control samples in microbiota analyses. Oral and sputum sample  
40  
41 volumes were recorded. Using sterile technique, sputum samples were divided for cell count  
42  
43 and gram stain performed by the clinical microbiology laboratory and microbiota analyses  
44  
45 (including biomass quantification).  
46  
47  
48  
49  
50  
51  
52  
53  
54  
55  
56  
57  
58  
59  
60



1  
2  
3 Participants were instructed to swish 15 mL of the study medication (either 0.12%  
4  
5 chlorhexidine or placebo) in their mouth for 30 seconds twice daily (morning and evening)  
6  
7 followed by expectoration. The study mouth rinse was used twice daily for eight weeks.  
8  
9

10 Participants were told to avoid routine dental clinic visits during the study period.  
11  
12  
13

14  
15 After four weeks of study mouth rinse use, the study coordinator conducted a mid-study phone  
16  
17 call to assess for hospitalizations, Emergency Department visits, unplanned clinic visits, new  
18  
19 medication use (including antibiotics), compliance with the study drug, BCSS diary completion,  
20  
21 and to assess adverse events. Additional study drug was mailed to participants by the research  
22  
23 pharmacist following this phone call.  
24  
25  
26  
27  
28  
29

30 Eight weeks after randomization participants returned for a second study visit. They were  
31  
32 instructed not to use the study mouth rinse the morning of the visit. Participants returned  
33  
34 completed BCSS diaries and used study medication bottles to the study coordinator, who noted  
35  
36 any remaining volume of study drug. Participants again completed the SGRQ, completed  
37  
38 questionnaires (assessing medication changes, hospitalizations, Emergency Department visits,  
39  
40 unplanned clinic visits, new medication use), and provided samples (blood, oral rinses, and  
41  
42 induced sputum) for biomarker and microbiota analyses.  
43  
44  
45  
46  
47  
48  
49

50 The BCSS (a daily diary for tracking the severity of respiratory symptoms) was started on Day 1,  
51  
52 the day of first treatment. Participants answered three symptom questions on a 0 to 4 scale  
53  
54 and a total daily score was calculated from those answers. Baseline BCSS score was the average  
55  
56  
57  
58

1  
2  
3 of daily BCSS measurements from Days 1-7. Week 8 BCSS score was the average of daily BCSS  
4  
5 measurements from Days 50-56.  
6  
7  
8  
9

10 The SGRQ is a self-administered questionnaire that measures pulmonary disease-related quality  
11  
12 of life. It has been validated for use in many chronic lung diseases, including COPD.<sup>3</sup> The SGRQ  
13  
14 is scored on a scale of 0 to 100, with 100 reflecting the most severe symptoms. The minimum  
15  
16 clinically important difference in the SGRQ is widely accepted as being 4 units.<sup>4</sup>  
17  
18  
19  
20  
21  
22

23 The clinical laboratories at the MVAMC determined WBC and differential, fibrinogen, CRP  
24  
25 levels, and sputum gram stain and culture results. All oral rinses, sputum samples, and unused  
26  
27 sterile water (control samples) were frozen immediately and until DNA extraction. 16S rRNA  
28  
29 quantification and 16S rRNA V4 MiSeq sequencing was performed at the University of  
30  
31 Minnesota Genomics Center as previously described.<sup>5</sup>  
32  
33  
34  
35  
36  
37

### 38 Outcomes

39  
40 The primary study outcome was change in oral and sputum microbiota biomass after 8 weeks  
41  
42 of study medication use, compared to baseline values, in participants who used 0.12%  
43  
44 chlorhexidine oral rinses vs. placebo as assessed by 16S rRNA quantification. To adjust biomass  
45  
46 for the size of the sputum sample, raw counts were normalized by dividing by the sample  
47  
48 volume or mass. Secondary outcomes (all compared to baseline values in participants receiving  
49  
50 chlorhexidine vs. placebo) included: i) sputum and oral microbiota alpha diversity (as assessed  
51  
52 by Shannon and Simpson diversity); ii) sputum and oral microbiota taxonomy; iii) inflammatory  
53  
54  
55  
56  
57  
58  
59  
60

1  
2  
3 markers (WBC, fibrinogen, and CRP); iv) BCSS scores (week 8 vs. week 1); v) SGRQ score; and vi)  
4  
5 assessment of adverse events. Adverse events were assessed both during the mid-study phone  
6  
7  
8 call and at the second visit by assessing hospitalizations, new medication use, and death.  
9  
10 Participants were asked specifically about known adverse events associated with chlorhexidine  
11  
12 oral rinses (oral pain, decreased taste, and tooth discoloration) and open-ended questions  
13  
14  
15 about new symptoms.  
16  
17  
18  
19

### 20 Statistical analysis

21  
22 The power analysis for the study examined the power to detect differences in lung microbiota  
23  
24 diversity as measured by the Simpson (1-D) diversity measure, ranging from 0.22 to 0.32  
25  
26 between the treatment groups using a two-sample t-test with equal variances. Our data  
27  
28 showed that age had a significant positive impact on Simpson diversity with a change in  
29  
30 diversity of 0.34 and the averaged standard deviation in the Simpson measure among moderate  
31  
32 and severely affected COPD patients of 0.281. If chlorhexidine were to have an effect size  
33  
34 similar to the effect of age with 20 participants per group, there was 67%, 75%, 81%, 87%, 91%,  
35  
36 and 94% power to detect a difference of 0.22, 0.24, 0.26, 0.28, 0.30, and 0.32 between  
37  
38  
39  
40  
41  
42  
43  
44  
45  
46  
47 treatment groups.

47 Baseline variables were compared using Fisher's Exact Test for categorical variables or the  
48  
49 Wilcoxon Two-Sample Test for continuous variables. Means are presented with standard  
50  
51 deviations (SD); mean differences and parameter estimates are presented with their associated  
52  
53 standard error (SE).  
54  
55  
56  
57  
58  
59

1  
2  
3  
4  
5  
6 All analyses were performed using SAS version 9.4 (SAS Institute) and the intention-to-treat  
7  
8 principle. A two-sided type I error of 0.05 was used. Correction of the Type I error rate for  
9  
10 multiple testing was performed for the endpoints that report results from both oral wash and  
11  
12 sputum samples using the Step-down Bonferroni method.<sup>6</sup>  
13  
14  
15

16  
17  
18 For the primary analysis of both normalized oral wash and normalized sputum biomass count,  
19  
20 values were transformed to the  $\log_{10}$  scale and the mean difference between treatment groups  
21  
22 was compared using the two-sample t-test. Additionally, for the analysis of sputum biomass  
23  
24 count, a multiple imputation procedure was used to impute each unavailable sputum weight  
25  
26 (PROC MI with seed=501213, MCMC method, and acceptable value range of 0.01 to 2.5). For  
27  
28 each of the 25 datasets created by the procedure, the normalized biomass (count/mass) was  
29  
30 calculated, the values were transformed to the  $\log_{10}$  scale, and a t-test was performed. Lastly,  
31  
32 PROC MIANALYZE was used to obtain an estimate from the t-test that accounted for the  
33  
34 variability in the imputed values.  
35  
36  
37  
38  
39  
40  
41

42 Linear regression was used to examine the effect of treatment group on the 8-week change in  
43  
44 the Shannon and Simpson biodiversity indices, BCSS, SGRQ and inflammatory markers  
45  
46 separately, with each model adjusted for the baseline value of the measure.  
47  
48  
49  
50

51  
52 Subgroup analyses of participants who did not receive antibiotics during the study were also  
53  
54 performed for the outcomes of biomass and biodiversity.  
55  
56  
57  
58

1  
2  
3  
4  
5  
6 For taxa abundance analyses, the number of sequences assigned to each genus were  
7  
8 determined for each sputum and oral wash sample. Treatment effects on the abundance of  
9  
10 each genera were examined by modeling the 8-week change using linear regression, adjusted  
11  
12 for baseline count. We restricted the analyses to the genera with <20% of values equal to  
13  
14 zero. In addition, the proportion with organisms detected at Week 8 was compared between  
15  
16 treatment groups for each genus using Fisher's Exact Test. Results were corrected for multiple  
17  
18 comparisons.  
19  
20  
21  
22  
23  
24

25 A data monitoring committee did not oversee the study. The study was registered in  
26  
27 ClinicalTrials.gov as NCT02252588.  
28  
29  
30  
31

### 32 Role of funding source

33  
34  
35 The funder of the study had no role in study design, data collection, data analysis, data  
36  
37 interpretation, or writing of the report. The corresponding author had full access to all the data  
38  
39 in the study and had final responsibility for the decision to submit for publication.  
40  
41  
42  
43  
44  
45  
46  
47  
48  
49  
50  
51  
52  
53  
54  
55  
56  
57  
58  
59  
60

Table S1. Biomass ( $\log_{10}$ ) from oral wash and sputum samples by treatment group

|                          | Oral Wash ( $\log_{10}$ molecules/ $\mu\text{L}/\text{mL}$ ) |              |                |              | Sputum ( $\log_{10}$ molecules/ $\mu\text{L}/\text{gram}$ ) |             |                |              |
|--------------------------|--------------------------------------------------------------|--------------|----------------|--------------|-------------------------------------------------------------|-------------|----------------|--------------|
|                          | Chlorhexidine (N=24)                                         |              | Placebo (N=20) |              | Chlorhexidine (N=24)                                        |             | Placebo (N=20) |              |
|                          | N                                                            | Mean (SD)    | N              | Mean (SD)    | N                                                           | Mean (SD)   | N              | Mean (SD)    |
| Biomass at Baseline      | 24                                                           | 5.22 (0.58)  | 20             | 5.38 (0.48)  | 21                                                          | 6.07 (1.15) | 13             | 6.66 (0.59)  |
| Biomass at Week 8        | 20                                                           | 4.94 (0.96)  | 20             | 5.24 (0.34)  | 17                                                          | 6.35 (1.04) | 15             | 6.31 (0.86)  |
| Change in biomass        | 20                                                           | -0.24 (1.00) | 20             | -0.14 (0.32) | 15                                                          | 0.42 (1.24) | 12             | -0.38 (1.13) |
| Excluding antibiotic use | Chlorhexidine (N=21)                                         |              | Placebo (N=15) |              | Chlorhexidine (N=19)                                        |             | Placebo (N=10) |              |
| Biomass at Baseline      | 21                                                           | 5.23 (0.61)  | 15             | 5.48 (0.48)  | 19                                                          | 6.14 (1.18) | 10             | 6.77 (0.55)  |
| Biomass at Week 8        | 17                                                           | 4.93 (1.04)  | 15             | 5.29 (0.37)  | 16                                                          | 6.39 (1.06) | 11             | 6.19 (0.97)  |
| Change in biomass        | 17                                                           | -0.26 (1.09) | 15             | -0.19 (0.31) | 14                                                          | 0.45 (1.28) | 9              | -0.62 (1.20) |

Abbreviations: SD = Standard deviation.

Table S2. Linear regression results of the effect of treatment group on the change in biodiversity – subgroup of participants who did not use antibiotics during the study (N=32)

| Outcome                                           | Linear Regression            |                |                    |                               |
|---------------------------------------------------|------------------------------|----------------|--------------------|-------------------------------|
|                                                   | Predictor                    | Estimate(SE)   | Unadjusted P-value | Adjusted P-value <sup>1</sup> |
| Shannon Diversity Index Change (Week 8- Baseline) |                              |                |                    |                               |
| Oral Wash (N=32)                                  | Treatment Group <sup>2</sup> | -0.369 (0.097) | 0.0007             | 0.0014                        |
|                                                   | Baseline Index               | -0.168 (0.080) | 0.0446             |                               |
| Sputum (N=28)                                     | Treatment Group              | -0.675 (0.192) | 0.0017             | 0.0017                        |
|                                                   | Baseline Index               | -0.455 (0.132) | 0.0020             |                               |
| Simpson Diversity Index Change (Week 8- Baseline) |                              |                |                    |                               |
| Oral Wash (N=32)                                  | Treatment Group              | -0.026 (0.008) | 0.0021             | 0.0042                        |
|                                                   | Baseline Index               | 0.052 (0.135)  | 0.7021             |                               |
| Sputum (N=28)                                     | Treatment Group              | -0.087 (0.031) | 0.0097             | 0.0097                        |
|                                                   | Baseline Index               | -0.680 (0.188) | 0.0013             |                               |

<sup>1</sup>A Step-down Bonferroni p-value adjustment is made for the two comparisons (oral wash and sputum) within each Diversity Index.

<sup>2</sup>Treatment group is coded as Chlorhexidine = 1, Placebo = 0.

Table S3. Linear regression analysis of the effect of treatment group on secondary outcomes

|                                           |    | <b>Chlorhexidine<br/>(N=20)</b> |    | <b>Placebo<br/>(N=20)</b> | <b>Treatment Group<sup>1</sup></b> | <b>P-value<sup>2</sup></b> |
|-------------------------------------------|----|---------------------------------|----|---------------------------|------------------------------------|----------------------------|
| <b>Outcome: 8-week Change<sup>3</sup></b> | N  | Mean ± SD                       | N  | Mean ± SD                 | Estimate (95% CI)                  |                            |
| C-reactive Protein (mg/L)                 | 20 | 1.8 ± 7.5                       | 20 | 0.4 ± 6.8                 | 1.54 (-2.72, 5.80)                 | 0.467                      |
| Fibrinogen (mg/dL)                        | 19 | 22.5 ± 77.8                     | 20 | 10.0 ± 77.0               | 20.19 (-28.52, 68.91)              | 0.406                      |
| Leukocytes (K/cmm)                        | 20 | 0.2 ± 1.8                       | 19 | 0.5 ± 1.8                 | -0.32 (-1.42, 0.78)                | 0.560                      |

<sup>1</sup> Treatment group is coded as Chlorhexidine = 1, Placebo = 0.

<sup>2</sup> The p-value is for the comparison of chlorhexidine vs. placebo.

<sup>3</sup> Each model is adjusted for the baseline value of each outcome.

Abbreviations: SD = Standard deviation; CI = Confidence interval.

Table S4. Adverse events by treatment group

|                                                          | <b>Week 4 Phone Call</b>         |                | <b>Week 8 Visit</b>  |                |
|----------------------------------------------------------|----------------------------------|----------------|----------------------|----------------|
|                                                          | <b>Chlorhexidine<sup>1</sup></b> | <b>Placebo</b> | <b>Chlorhexidine</b> | <b>Placebo</b> |
| <b>Number of Randomized Participants</b>                 | <b>23</b>                        | <b>20</b>      | <b>20</b>            | <b>20</b>      |
| Irritation and/or sores of the lining of the mouth, N(%) | 0 (0.0)                          | 1 (5.0)        | 0 (0.0)              | 1 (5.3)        |
| Allergic reaction (swelling, rash, or hives), N(%)       | 0 (0.0)                          | 0 (0.0)        | 0 (0.0)              | 0 (0.0)        |
| Change in taste, N(%)                                    | 0 (0.0)                          | 0 (0.0)        | 0 (0.0)              | 0 (0.0)        |
| Discoloration of teeth, N(%)                             | 0 (0.0)                          | 0 (0.0)        | 0 (0.0)              | 1 (5.3)        |
| Other side effects, N(%) <sup>2,3</sup>                  | 2 (8.7)                          | 3 (15.0)       | 2 (11.1)             | 0 (0.0)        |

<sup>1</sup> Due to study withdrawals, adverse effects were assessed for 23 of 24 chlorhexidine participants at Week 4 and 20 of 24 at Week 8.

<sup>2</sup> Other adverse effects in the chlorhexidine group - dry mouth (1 patient at Week 4), feeling of loose teeth + cough + green tinged sputum (1 patient at Week 4), widening gaps in teeth (1 patient at Week 8) and blue tongue for 15-20 minutes after using drug (1 patient at Week 4), widening gaps in teeth (1 patient at Week 8) and blue tongue for 15-20 minutes after using drug (1 patient at Week 8).

<sup>3</sup> Other adverse effects in the Placebo group - increased congestion (1 patient at Week 4), sinus/nasal infection (1 patient at Week 4), and dry mouth/dry cough (1 patient at Week 4).

Figure S1. Rarefaction curve.

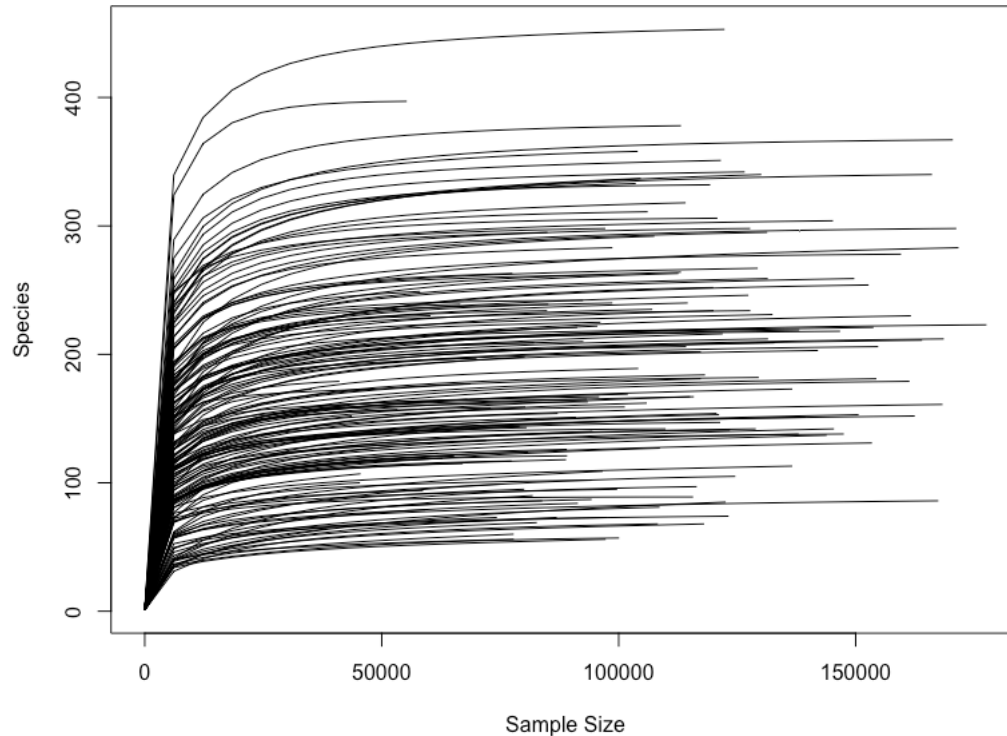

Figure S1. Rarefaction curve. Each sample is represented by a line which illustrates the number of species identified within a subset of sequences taken from that sample. Horizontal asymptotes indicate that additional sequences obtained from that sample are unlikely to identify additional species.

## References

1.

<https://www.google.com/url?sa=t&rct=j&q=&esrc=s&source=web&cd=&ved=2ahUKEwj5uKeM3IzsAhXYWc0KHS4nCHYQFjAAegQIBBAB&url=https%3A%2F%2Fwww.accessdata.fda>



1  
2  
3 .gov%2Fdrugsatfda\_docs%2Fnda%2Fpre96%2F73695\_PerioGard\_Prntlbl.pdf&usg=AOvVa  
4  
5 w16U5biulfx1TcGpyoeX\_wg.

6  
7  
8 [https://www.accessdata.fda.gov/drugsatfda\\_docs/nda/pre96/73695\\_PerioGard\\_Prntlbl.p](https://www.accessdata.fda.gov/drugsatfda_docs/nda/pre96/73695_PerioGard_Prntlbl.pdf)  
9  
10 df. Accessed July 12, 2020.

- 11  
12  
13 2. Leidy NK, Rennard SI, Schmier J, Jones MK, Goldman M. The breathlessness, cough, and  
14  
15 sputum scale: the development of empirically based guidelines for interpretation. *Chest*.  
16  
17 2003;124(6):2182-2191.
- 18  
19  
20 3. Jones PW, Quirk FH, Baveystock CM. The St George's Respiratory Questionnaire. *Respir*  
21  
22 *Med*. 1991;85 Suppl B:25-31; discussion 33.
- 23  
24  
25 4. Jones PW. St. George's Respiratory Questionnaire: MCID. *COPD*. 2005;2(1):75-79.
- 26  
27  
28 5. Pragman AA, Knutson KA, Gould TJ *et al*. Chronic obstructive pulmonary disease upper  
29  
30 airway microbiome is associated with select clinical characteristics. *PLOS ONE*.  
31  
32 2019;14(7):e0219962.
- 33  
34  
35 6. Holm S. A simple sequentially rejective multiple test procedure. *Scand J Stat*. 1979;6:65-  
36  
37 70.



## CONSORT 2010 checklist of information to include when reporting a randomised trial\*

| Section/Topic                    | Item No | Checklist item                                                                                                                                                                              | Reported on page No |
|----------------------------------|---------|---------------------------------------------------------------------------------------------------------------------------------------------------------------------------------------------|---------------------|
| <b>Title and abstract</b>        |         |                                                                                                                                                                                             |                     |
|                                  | 1a      | Identification as a randomised trial in the title                                                                                                                                           | 5                   |
|                                  | 1b      | Structured summary of trial design, methods, results, and conclusions (for specific guidance see CONSORT for abstracts)                                                                     | 2                   |
| <b>Introduction</b>              |         |                                                                                                                                                                                             |                     |
| Background and objectives        | 2a      | Scientific background and explanation of rationale                                                                                                                                          | 4-5                 |
|                                  | 2b      | Specific objectives or hypotheses                                                                                                                                                           | 5                   |
| <b>Methods</b>                   |         |                                                                                                                                                                                             |                     |
| Trial design                     | 3a      | Description of trial design (such as parallel, factorial) including allocation ratio                                                                                                        | 5-6                 |
|                                  | 3b      | Important changes to methods after trial commencement (such as eligibility criteria), with reasons                                                                                          | 6                   |
| Participants                     | 4a      | Eligibility criteria for participants                                                                                                                                                       | 6                   |
|                                  | 4b      | Settings and locations where the data were collected                                                                                                                                        | 6                   |
| Interventions                    | 5       | The interventions for each group with sufficient details to allow replication, including how and when they were actually administered                                                       | 5-7                 |
| Outcomes                         | 6a      | Completely defined pre-specified primary and secondary outcome measures, including how and when they were assessed                                                                          | 7                   |
|                                  | 6b      | Any changes to trial outcomes after the trial commenced, with reasons                                                                                                                       | NA                  |
| Sample size                      | 7a      | How sample size was determined                                                                                                                                                              | 7                   |
|                                  | 7b      | When applicable, explanation of any interim analyses and stopping guidelines                                                                                                                | NA                  |
| <b>Randomisation:</b>            |         |                                                                                                                                                                                             |                     |
| Sequence generation              | 8a      | Method used to generate the random allocation sequence                                                                                                                                      | 6                   |
|                                  | 8b      | Type of randomisation; details of any restriction (such as blocking and block size)                                                                                                         | 6                   |
| Allocation concealment mechanism | 9       | Mechanism used to implement the random allocation sequence (such as sequentially numbered containers), describing any steps taken to conceal the sequence until interventions were assigned | 6                   |
| Implementation                   | 10      | Who generated the random allocation sequence, who enrolled participants, and who assigned participants to interventions                                                                     | 6                   |
| Blinding                         | 11a     | If done, who was blinded after assignment to interventions (for example, participants, care providers, those                                                                                | 6                   |

|    |                          |                                                             |                                                                                                                  |
|----|--------------------------|-------------------------------------------------------------|------------------------------------------------------------------------------------------------------------------|
| 1  |                          | assessing outcomes) and how                                 |                                                                                                                  |
| 2  | 11b                      | If relevant, description of the similarity of interventions | NA                                                                                                               |
| 3  | Statistical methods      | 12a                                                         | Statistical methods used to compare groups for primary and secondary outcomes                                    |
| 4  |                          | 12b                                                         | Methods for additional analyses, such as subgroup analyses and adjusted analyses                                 |
| 5  |                          |                                                             | 8                                                                                                                |
| 6  | <b>Results</b>           |                                                             |                                                                                                                  |
| 7  | Participant flow (a      | 13a                                                         | For each group, the numbers of participants who were randomly assigned, received intended treatment, and         |
| 8  | diagram is strongly      |                                                             | were analysed for the primary outcome                                                                            |
| 9  | recommended)             | 13b                                                         | For each group, losses and exclusions after randomisation, together with reasons                                 |
| 10 | Recruitment              | 14a                                                         | Dates defining the periods of recruitment and follow-up                                                          |
| 11 |                          | 14b                                                         | Why the trial ended or was stopped                                                                               |
| 12 |                          |                                                             | 9                                                                                                                |
| 13 | Baseline data            | 15                                                          | A table showing baseline demographic and clinical characteristics for each group                                 |
| 14 | Numbers analysed         | 16                                                          | For each group, number of participants (denominator) included in each analysis and whether the analysis was      |
| 15 |                          |                                                             | by original assigned groups                                                                                      |
| 16 |                          |                                                             | 9                                                                                                                |
| 17 | Outcomes and             | 17a                                                         | For each primary and secondary outcome, results for each group, and the estimated effect size and its            |
| 18 | estimation               |                                                             | precision (such as 95% confidence interval)                                                                      |
| 19 |                          | 17b                                                         | For binary outcomes, presentation of both absolute and relative effect sizes is recommended                      |
| 20 | Ancillary analyses       | 18                                                          | Results of any other analyses performed, including subgroup analyses and adjusted analyses, distinguishing       |
| 21 |                          |                                                             | pre-specified from exploratory                                                                                   |
| 22 |                          |                                                             | 11-13                                                                                                            |
| 23 | Harms                    | 19                                                          | All important harms or unintended effects in each group (for specific guidance see CONSORT for harms)            |
| 24 |                          |                                                             | 13                                                                                                               |
| 25 | <b>Discussion</b>        |                                                             |                                                                                                                  |
| 26 | Limitations              | 20                                                          | Trial limitations, addressing sources of potential bias, imprecision, and, if relevant, multiplicity of analyses |
| 27 | Generalisability         | 21                                                          | Generalisability (external validity, applicability) of the trial findings                                        |
| 28 | Interpretation           | 22                                                          | Interpretation consistent with results, balancing benefits and harms, and considering other relevant evidence    |
| 29 |                          |                                                             | 16-17                                                                                                            |
| 30 | <b>Other information</b> |                                                             |                                                                                                                  |
| 31 | Registration             | 23                                                          | Registration number and name of trial registry                                                                   |
| 32 |                          |                                                             | 3                                                                                                                |
| 33 | Protocol                 | 24                                                          | Where the full trial protocol can be accessed, if available                                                      |
| 34 |                          |                                                             | 3                                                                                                                |
| 35 | Funding                  | 25                                                          | Sources of funding and other support (such as supply of drugs), role of funders                                  |
| 36 |                          |                                                             | facepage                                                                                                         |

\*We strongly recommend reading this statement in conjunction with the CONSORT 2010 Explanation and Elaboration for important clarifications on all the items. If relevant, we also recommend reading CONSORT extensions for cluster randomised trials, non-inferiority and equivalence trials, non-pharmacological treatments, herbal interventions, and pragmatic trials. Additional extensions are forthcoming: for those and for up to date references relevant to this checklist, see [www.consort-statement.org](http://www.consort-statement.org).
